# Supplementary material for: Mitogenomic Analysis and Phylogenetic Implications for the Deltocephaline Tribe Chiasmini (Hemiptera: Cicadellidae: Deltocephalinae)
Source: MDPI journal article supplement (doi:10.3390/insects15040253), 2024-04-08
Supplement: s1 [file s1]

**Table S1:** Best partitioning scheme and models for different datasets selected by PartitionFinder.

| Data matrix | Subset Partitions |                                                                               | Model       |
|-------------|-------------------|-------------------------------------------------------------------------------|-------------|
| AA-ML       | P1                | <i>ATP6, ATP8, COX2, COX3, CYTB, ND2, ND3, ND6</i>                            | MTART+I+G+F |
|             | P2                | <i>COXI</i>                                                                   | MTART+I+G   |
|             | P3                | <i>ND1, ND4, ND4L, ND5</i>                                                    | MTART+I+G+F |
| AA-BI       | P1                | <i>ATP6, ATP8, COX2, COX3, CYTB</i>                                           | MTREV+I+G   |
|             | P2                | <i>COXI</i>                                                                   | MTREV+I+G   |
|             | P3                | <i>ND1, ND3, ND4, ND5</i>                                                     | MTREV+I+G   |
|             | P4                | <i>ND2</i>                                                                    | MTREV+I+G   |
|             | P5                | <i>ND4L, ND6</i>                                                              | MTREV+I+G   |
| PCG12-ML    | P1                | <i>ATP6, ATP8, COXI, COX2, COX3, CYTB, ND1, ND2, ND3, ND4, ND4L, ND5, ND6</i> | GTR+I+G     |
| PCG12-BI    | P1                | <i>ATP6, ATP8, COXI, COX2, COX3, CYTB, ND1, ND2, ND3, ND4, ND4L, ND5, ND6</i> | GTR+I+G     |
| PCG12R-ML   | P1                | <i>ATP6, ATP8, COXI, COX2, COX3, CYTB, ND1, ND2, ND3, ND4, ND4L, ND5, ND6</i> | GTR+I+G     |
| PCG12R-BI   | P2                | <i>rrnL, rrnS</i>                                                             | TVM+I+G     |
|             | P1                | <i>ATP6, ATP8, COXI, COX2, COX3, CYTB, ND1, ND2, ND3, ND4, ND4L, ND5, ND6</i> | GTR+I+G     |
| PCG-ML      | P2                | <i>rrnL, rrnS</i>                                                             | GTR+I+G     |
|             | P1                | <i>ATP6_codon1</i>                                                            | GTR+I+G     |
|             | P2                | <i>ND2_codon2, ATP8_codon2, ND6_codon2, ND3_codon2, ATP6_codon2</i>           | TVM+I+G     |
|             | P3                | <i>COX2_codon3, ATP6_codon3, COX3_codon3, ND3_codon3</i>                      | TIM+I+G     |
|             | P4                | <i>ATP8_codon1, ND3_codon1, ND6_codon1, ND2_codon1</i>                        | GTR+I+G     |
|             | P5                | <i>ATP8_codon3, CYTB_codon3, ND6_codon3</i>                                   | GTR+G       |
|             | P6                | <i>COX1_codon1</i>                                                            | GTR+I+G     |
|             | P7                | <i>COX1_codon2, COX3_codon2, COX2_codon2, CYTB_codon2</i>                     | TVM+I+G     |
|             | P8                | <i>COX1_codon3</i>                                                            | TRN+I+G     |
|             | P9                | <i>CYTB_codon1, COX3_codon1, COX2_codon1</i>                                  | GTR+I+G     |
|             | P10               | <i>ND1_codon1, ND4_codon1, ND5_codon1, ND4L_codon1</i>                        | GTR+I+G     |
|             | P11               | <i>ND1_codon2, ND5_codon2, ND4_codon2, ND4L_codon2</i>                        | GTR+I+G     |
|             | P12               | <i>ND1_codon3</i>                                                             | K81UF+I     |
|             | P13               | <i>ND2_codon3</i>                                                             | TRN+G       |
| PCG-BI      | P14               | <i>ND4L_codon3, ND5_codon3, ND4_codon3</i>                                    | TRN+I+G     |
|             | P1                | <i>ATP6_codon1</i>                                                            | GTR+I+G     |
|             | P2                | <i>ND3_codon2, ATP6_codon2, ATP8_codon2, ND6_codon2, ND2_codon2</i>           | GTR+I+G     |
|             | P3                | <i>COX2_codon3, ATP6_codon3, ND3_codon3, COX3_codon3</i>                      | GTR+I+G     |
|             | P4                | <i>ATP8_codon1, ND6_codon1, ND2_codon1, ND3_codon1</i>                        | GTR+I+G     |
|             | P5                | <i>ATP8_codon3, ND6_codon3, CYTB_codon3</i>                                   | GTR+G       |
|             | P6                | <i>COX1_codon1</i>                                                            | GTR+I+G     |
|             | P7                | <i>COX1_codon2, COX3_codon2, COX2_codon2, CYTB_codon2</i>                     | GTR+I+G     |
|             | P8                | <i>COX1_codon3</i>                                                            | HKY+I+G     |
|             | P9                | <i>CYTB_codon1, COX3_codon1, COX2_codon1</i>                                  | GTR+I+G     |
|             | P10               | <i>ND1_codon1, ND4_codon1, ND4L_codon1, ND5_codon1</i>                        | GTR+I+G     |
|             | P11               | <i>ND1_codon2, ND5_codon2, ND4_codon2, ND4L_codon2</i>                        | GTR+I+G     |
|             | P12               | <i>ND1_codon3</i>                                                             | HKY+I+G     |
|             | P13               | <i>ND2_codon3</i>                                                             | GTR+G       |
|             | P14               | <i>ND4_codon3, ND4L_codon3, ND5_codon3</i>                                    | HKY+I+G     |

|                |     |                                                                       |         |
|----------------|-----|-----------------------------------------------------------------------|---------|
| <b>PCGR-ML</b> | P1  | <i>ATP6_codon1</i>                                                    | GTR+I+G |
|                | P2  | <i>ND2_codon2, ATP8_codon2, ND6_codon2, ATP6_codon2, ND3_codon2</i>   | TVM+I+G |
|                | P3  | <i>ATP6_codon3, COX3_codon3, ND3_codon3, COX1_codon3, COX2_codon3</i> | TIM+I+G |
|                | P4  | <i>ATP8_codon1, ND3_codon1, ND2_codon1, ND6_codon1</i>                | GTR+I+G |
|                | P5  | <i>ATP8_codon3, CYTB_codon3, ND6_codon3</i>                           | GTR+G   |
|                | P6  | <i>COX1_codon1</i>                                                    | GTR+I+G |
|                | P7  | <i>COX1_codon2, COX3_codon2, COX2_codon2, CYTB_codon2</i>             | TVM+I+G |
|                | P8  | <i>CYTB_codon1, COX2_codon1, COX3_codon1</i>                          | GTR+I+G |
|                | P9  | <i>ND1_codon1, rrnS</i>                                               | TVM+I+G |
|                | P10 | <i>ND1_codon2, ND4_codon2, ND4L_codon2, ND5_codon2</i>                | GTR+I+G |
|                | P11 | <i>ND1_codon3</i>                                                     | K81UF+I |
|                | P12 | <i>ND2_codon3</i>                                                     | TRN+G   |
|                | P13 | <i>ND4_codon1, ND5_codon1, ND4L_codon1</i>                            | GTR+I+G |
|                | P14 | <i>ND4L_codon3, ND4_codon3, ND5_codon3</i>                            | TRN+I+G |
|                | P15 | <i>rrnL</i>                                                           | GTR+I+G |
| <b>PCGR-BI</b> | P1  | <i>ATP6_codon1</i>                                                    | GTR+I+G |
|                | P2  | <i>ND3_codon2, ATP6_codon2, ATP8_codon2, ND2_codon2, ND6_codon2</i>   | GTR+I+G |
|                | P3  | <i>COX2_codon3, ATP6_codon3, ND3_codon3, COX3_codon3</i>              | GTR+I+G |
|                | P4  | <i>ATP8_codon1, ND6_codon1, ND2_codon1, ND3_codon1</i>                | GTR+I+G |
|                | P5  | <i>ATP8_codon3, ND6_codon3, CYTB_codon3</i>                           | GTR+G   |
|                | P6  | <i>COX1_codon1</i>                                                    | GTR+I+G |
|                | P7  | <i>COX1_codon2, COX3_codon2, COX2_codon2, CYTB_codon2</i>             | GTR+I+G |
|                | P8  | <i>COX1_codon3</i>                                                    | HKY+I+G |
|                | P9  | <i>CYTB_codon1, COX3_codon1, COX2_codon1</i>                          | GTR+I+G |
|                | P10 | <i>ND1_codon1, rrnS</i>                                               | GTR+I+G |
|                | P11 | <i>ND1_codon2, ND4_codon2, ND4L_codon2, ND5_codon2</i>                | GTR+I+G |
|                | P12 | <i>ND1_codon3</i>                                                     | HKY+I+G |
|                | P13 | <i>ND2_codon3</i>                                                     | GTR+G   |
|                | P14 | <i>ND4_codon1, ND4L_codon1, ND5_codon1</i>                            | GTR+I+G |
|                | P15 | <i>ND4L_codon3, ND4_codon3, ND5_codon3</i>                            | HKY+I+G |
|                | P16 | <i>rrnL</i>                                                           | GTR+I+G |

---
