# Supplementary material for: Mitogenomic Analysis and Phylogenetic Implications for the Deltocephaline Tribe Chiasmini (Hemiptera: Cicadellidae: Deltocephalinae)
Source: MDPI journal article supplement (doi:10.3390/insects15040253), 2024-04-08
Supplement: s1 [file s1]

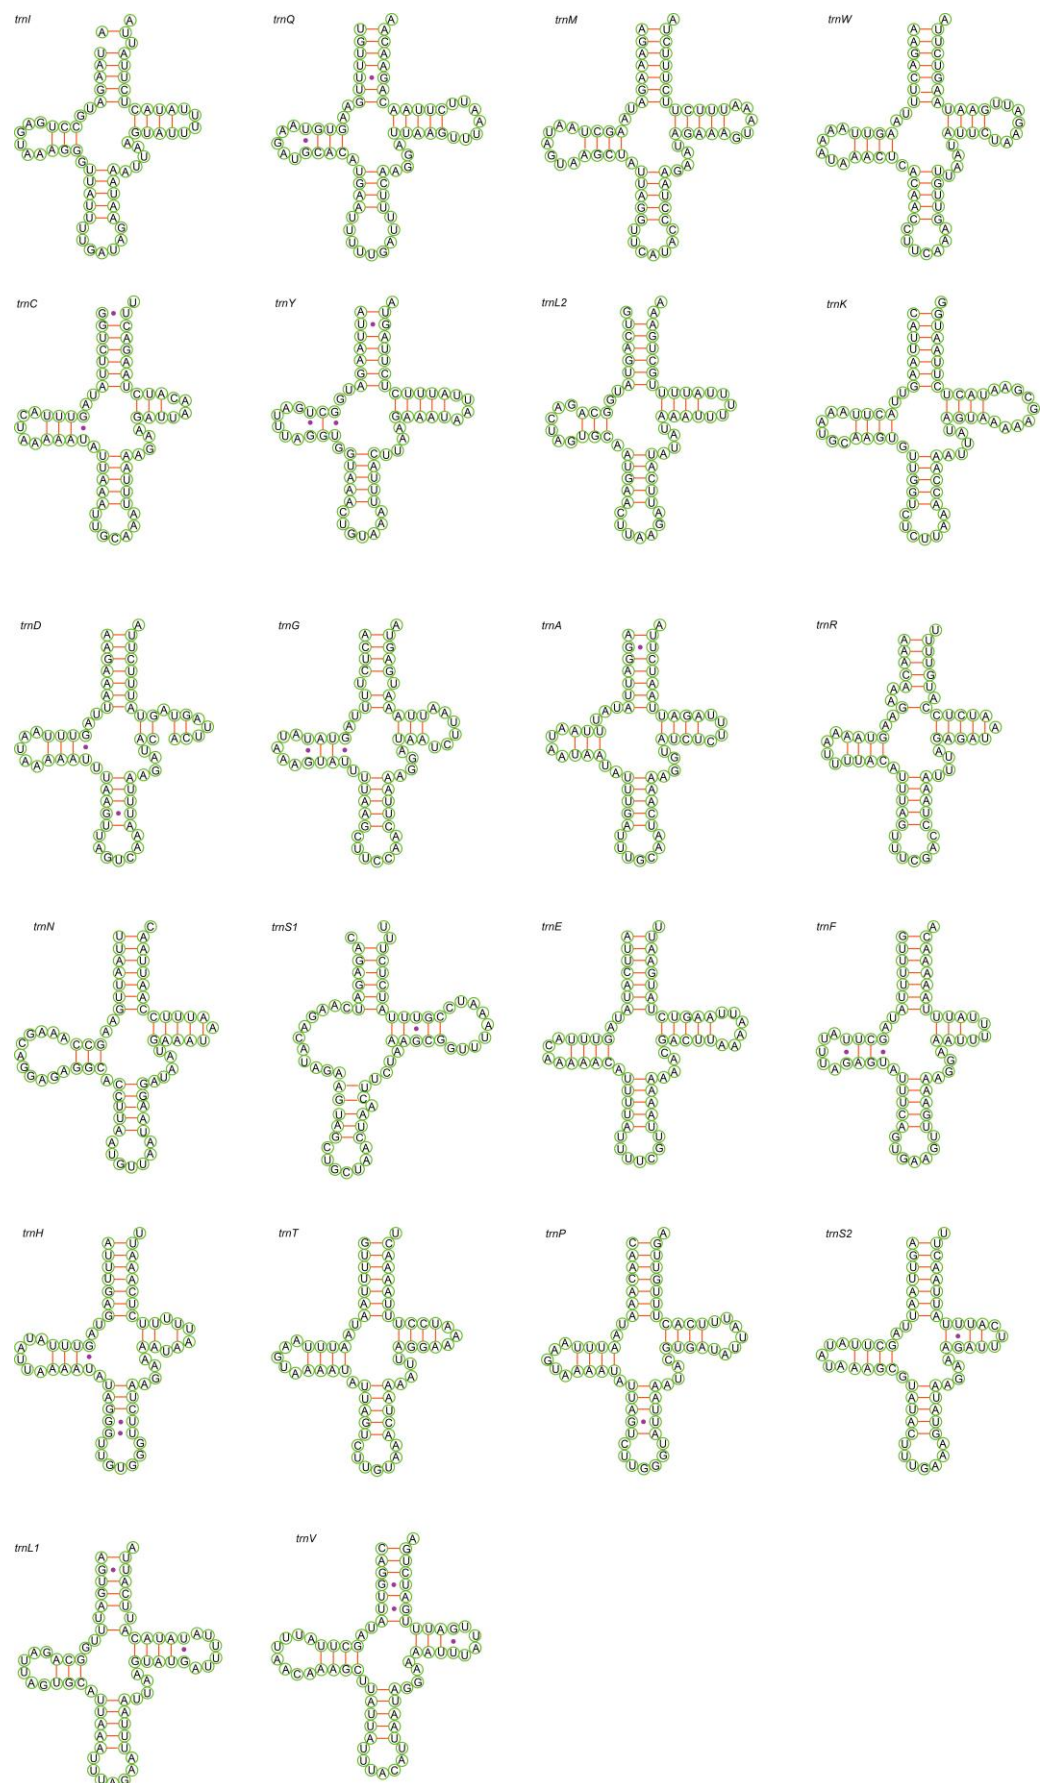

**Figure S1.** Predicted secondary structures of tRNA genes of *Aconurella diplachnis*.

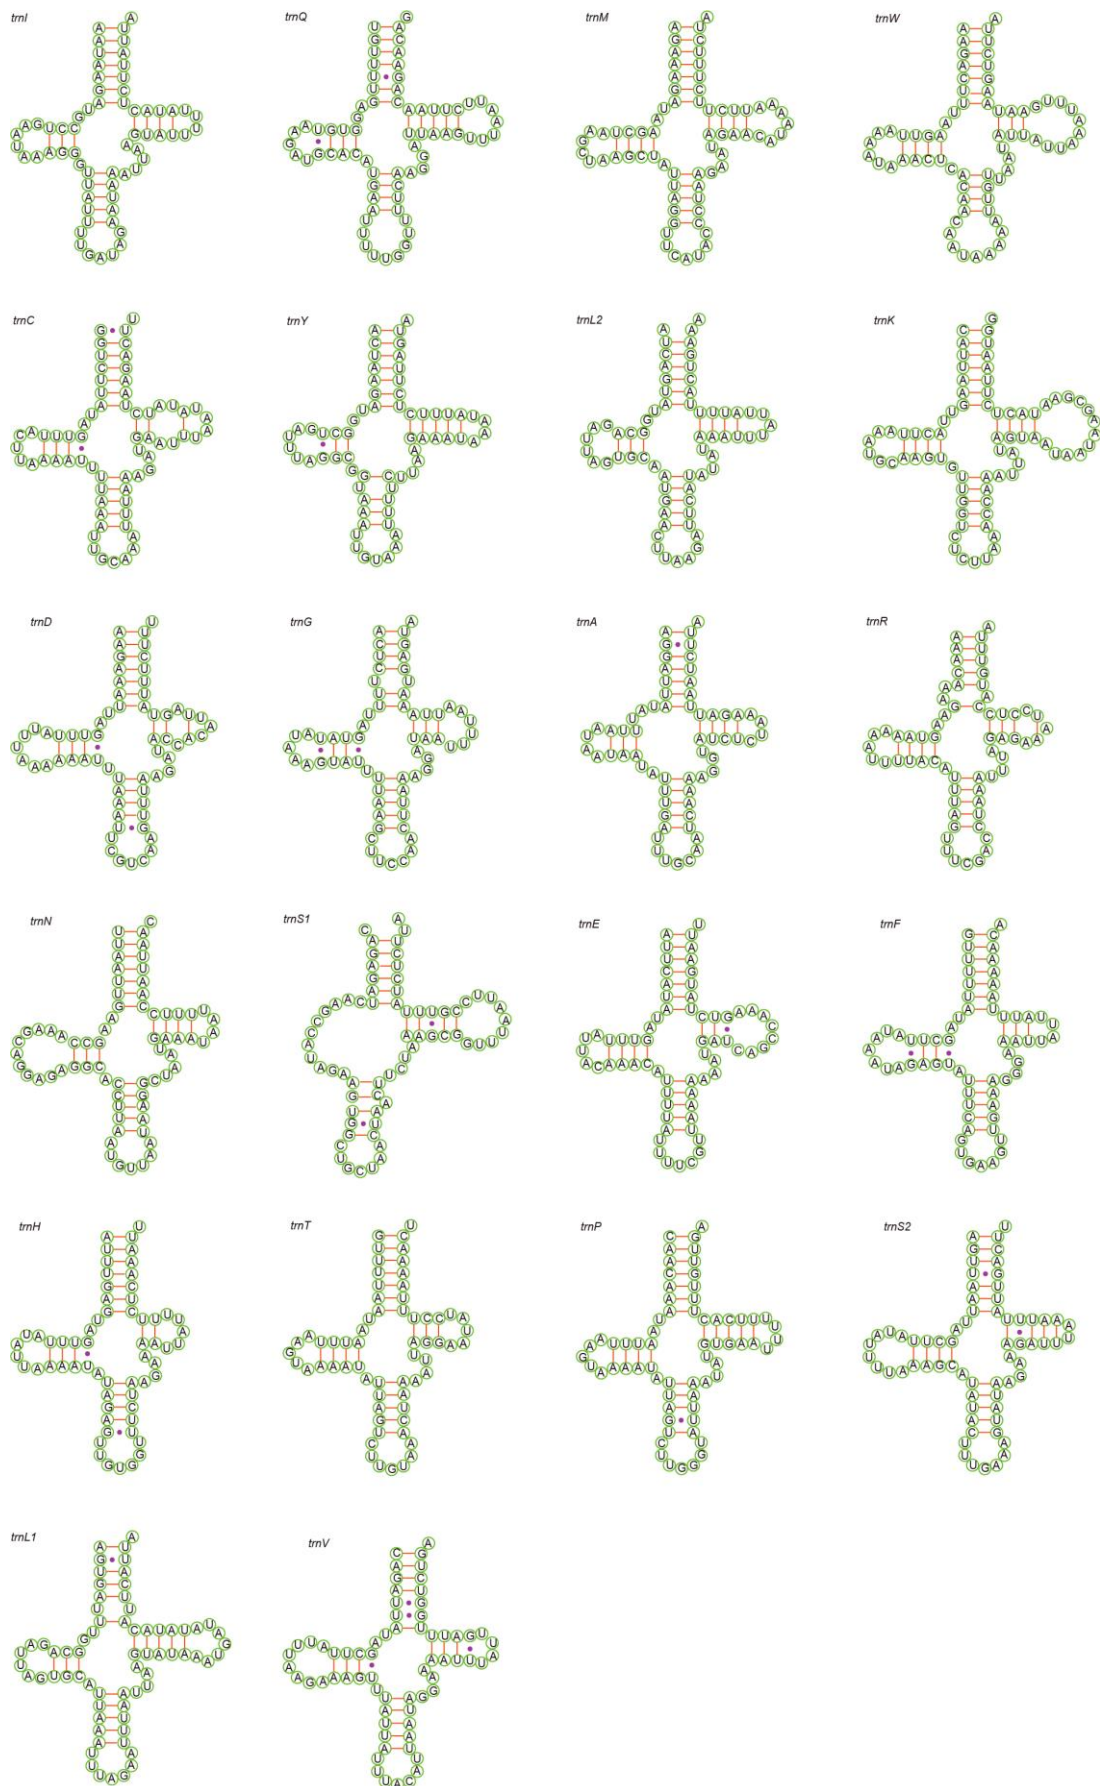

**Figure S2.** Predicted secondary structures of tRNA genes of *Aconurella montana*.

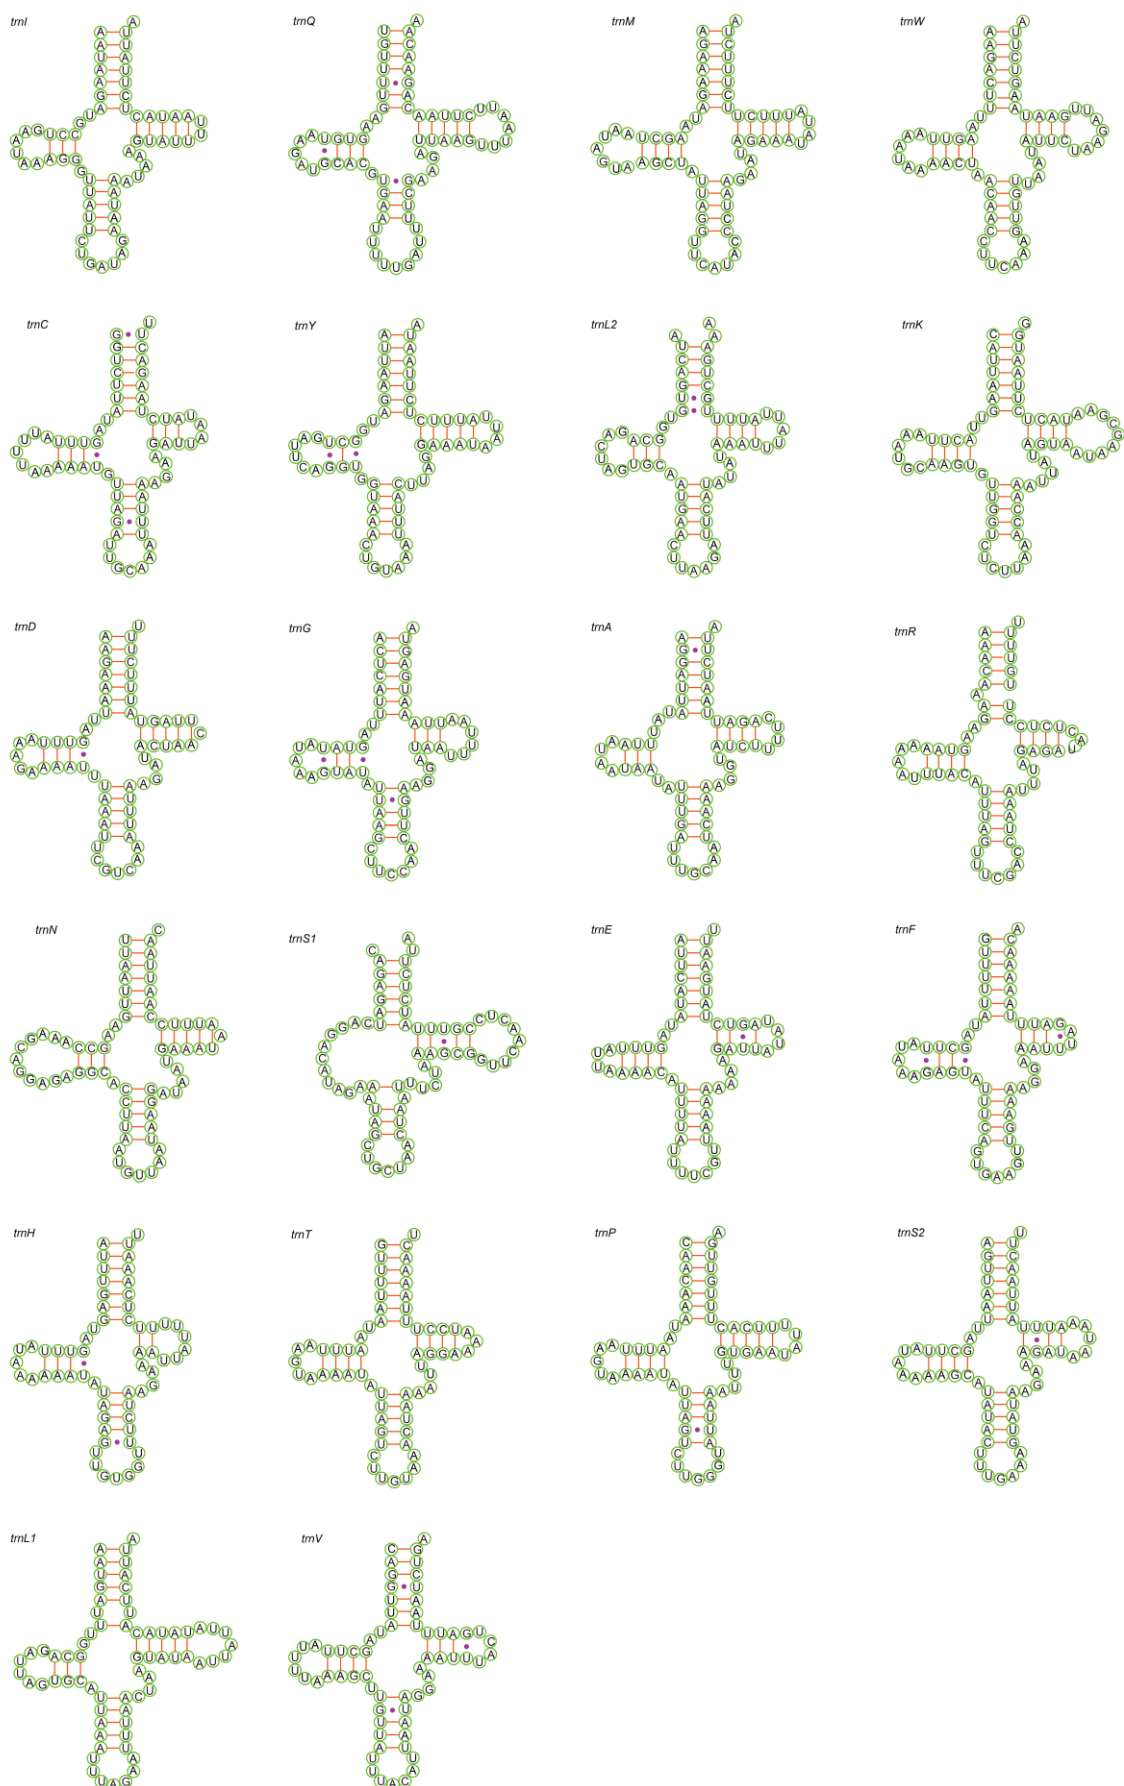

**Figure S3.** Predicted secondary structures of tRNA genes of *Aconurella prolixa*.



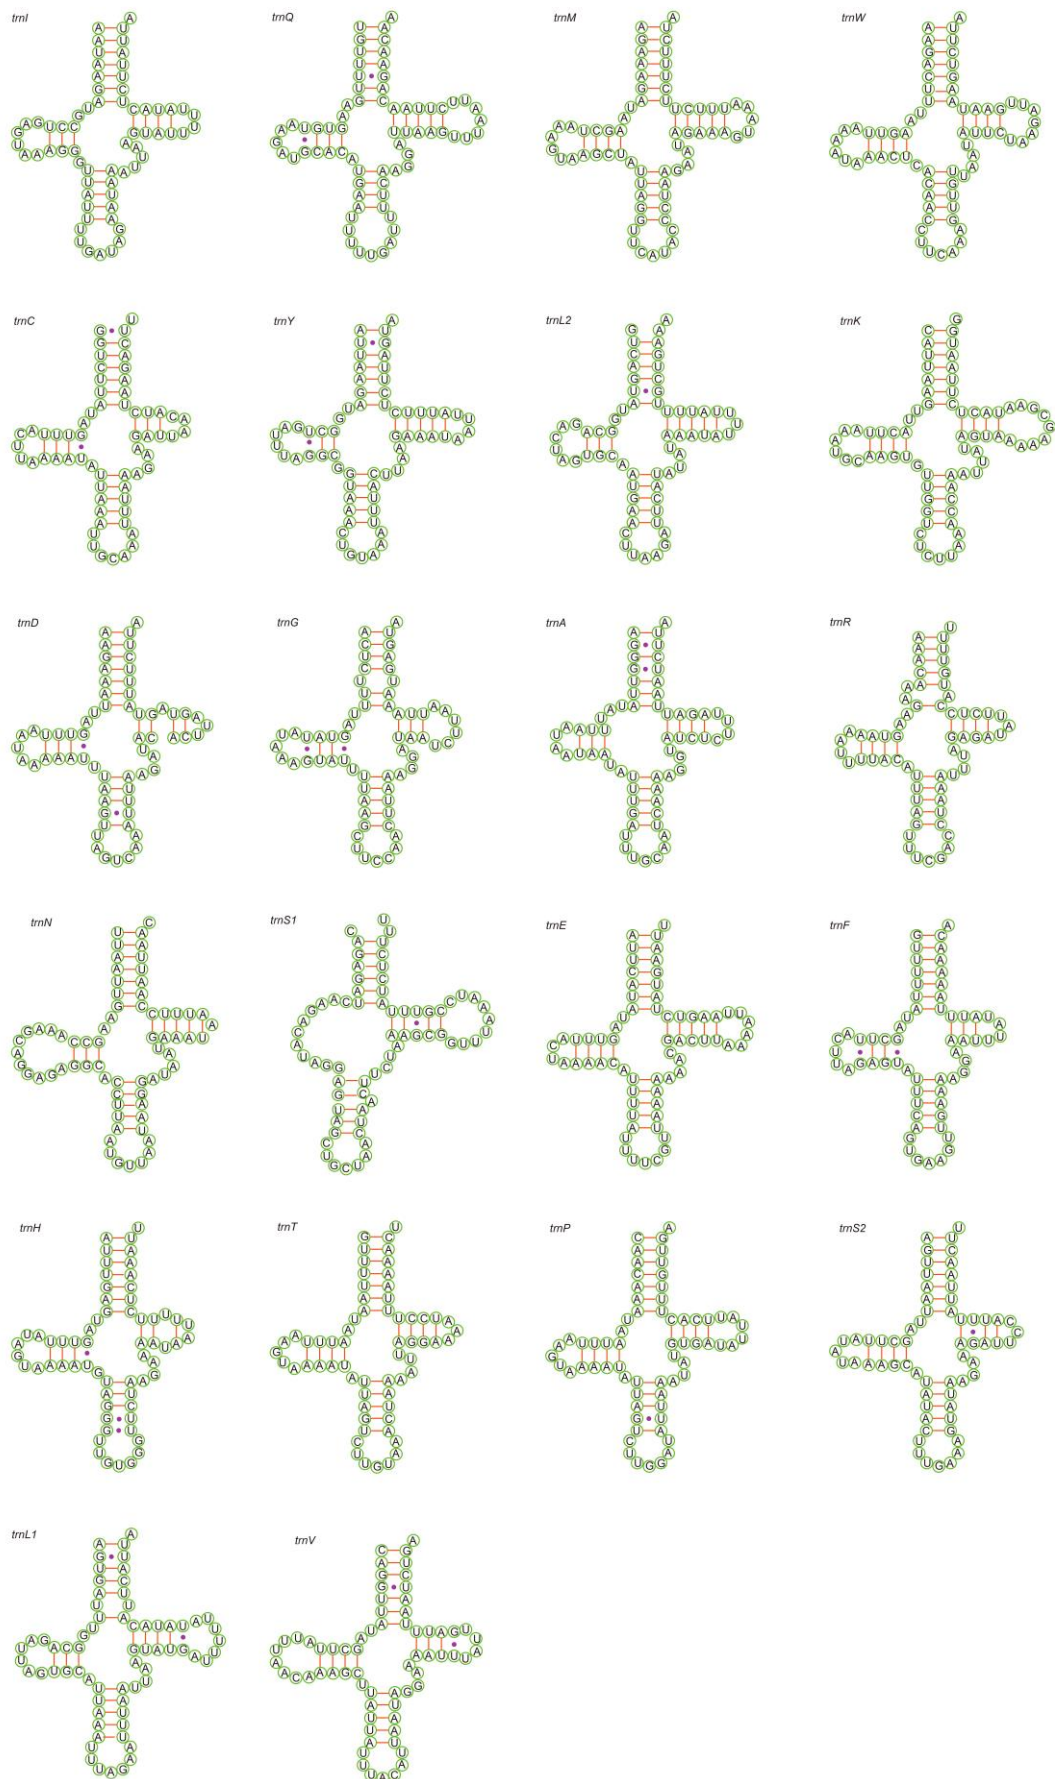

**Figure S4.** Predicted secondary structures of tRNA genes of *Aconurella sibirica*.

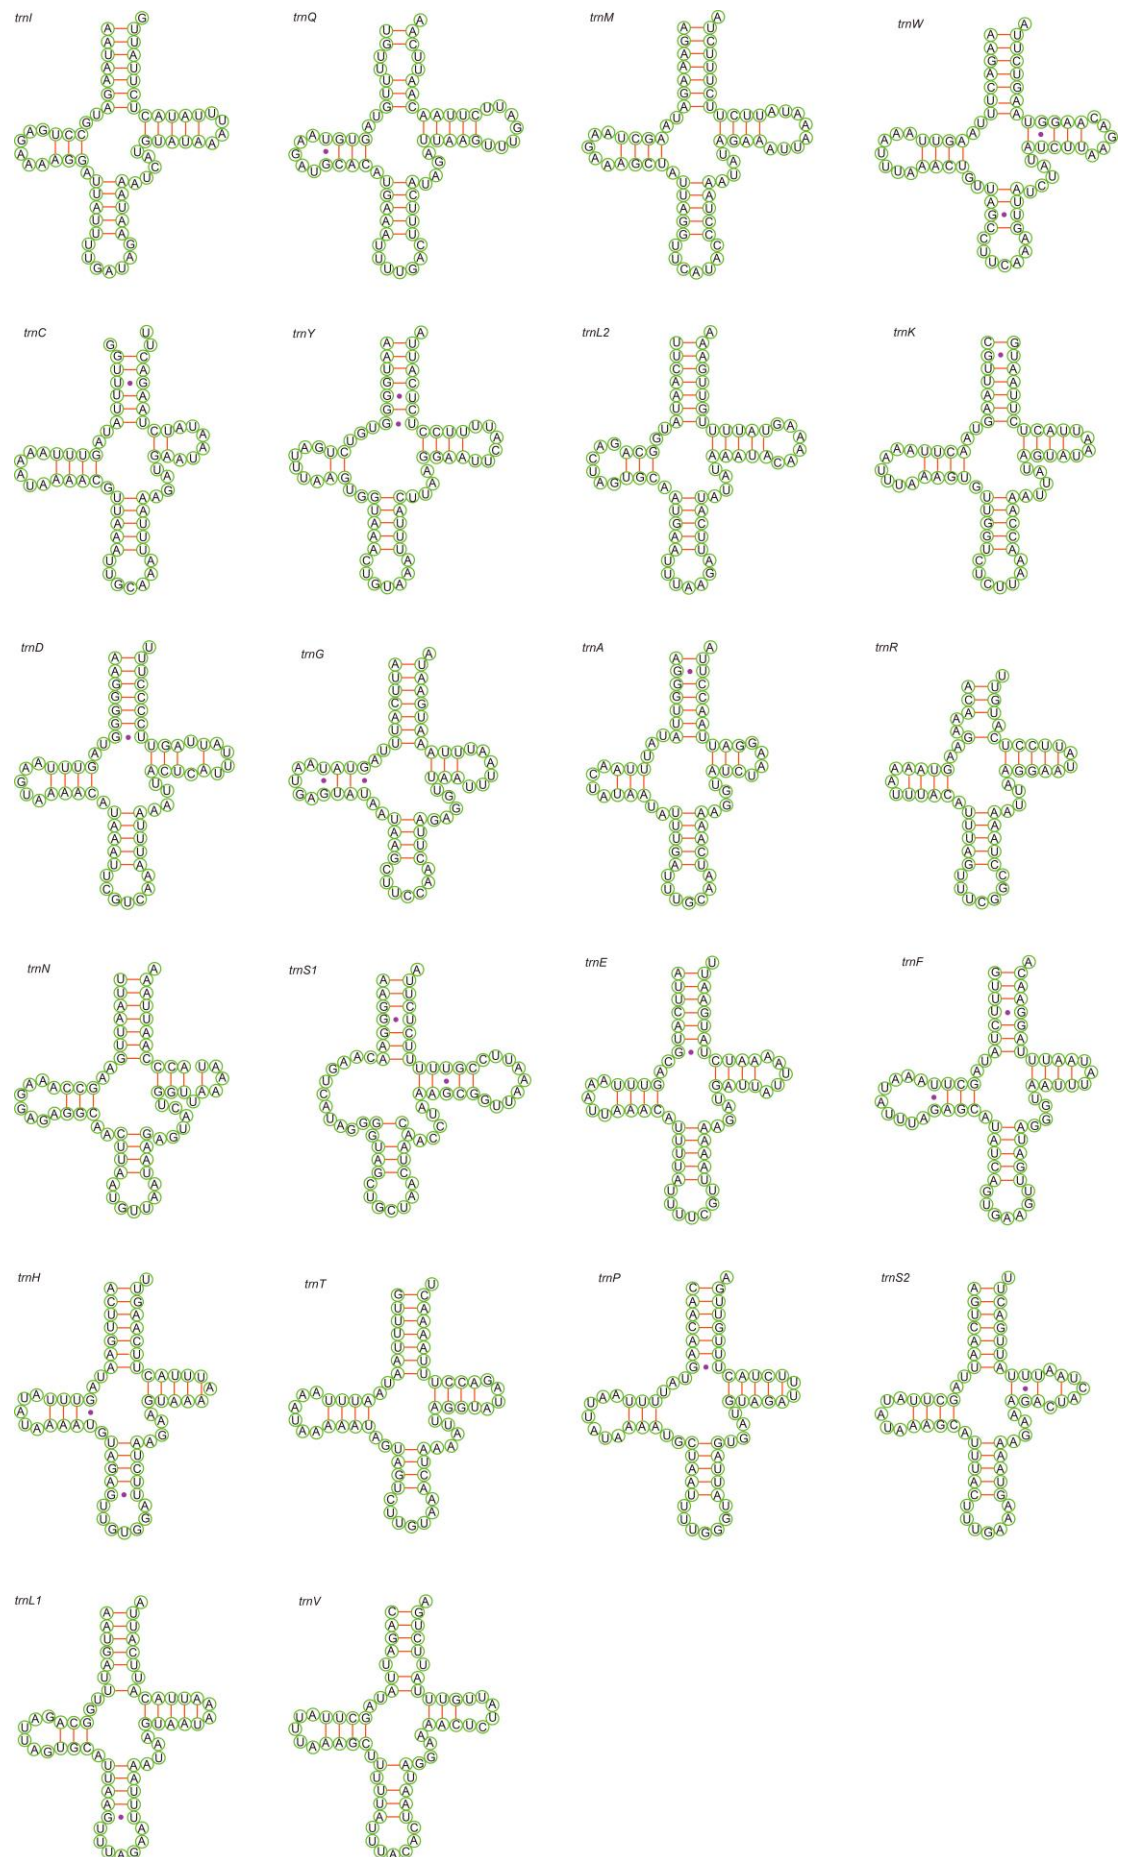

**Figure S5.** Predicted secondary structures of tRNA genes of *Exitianus nanus*.

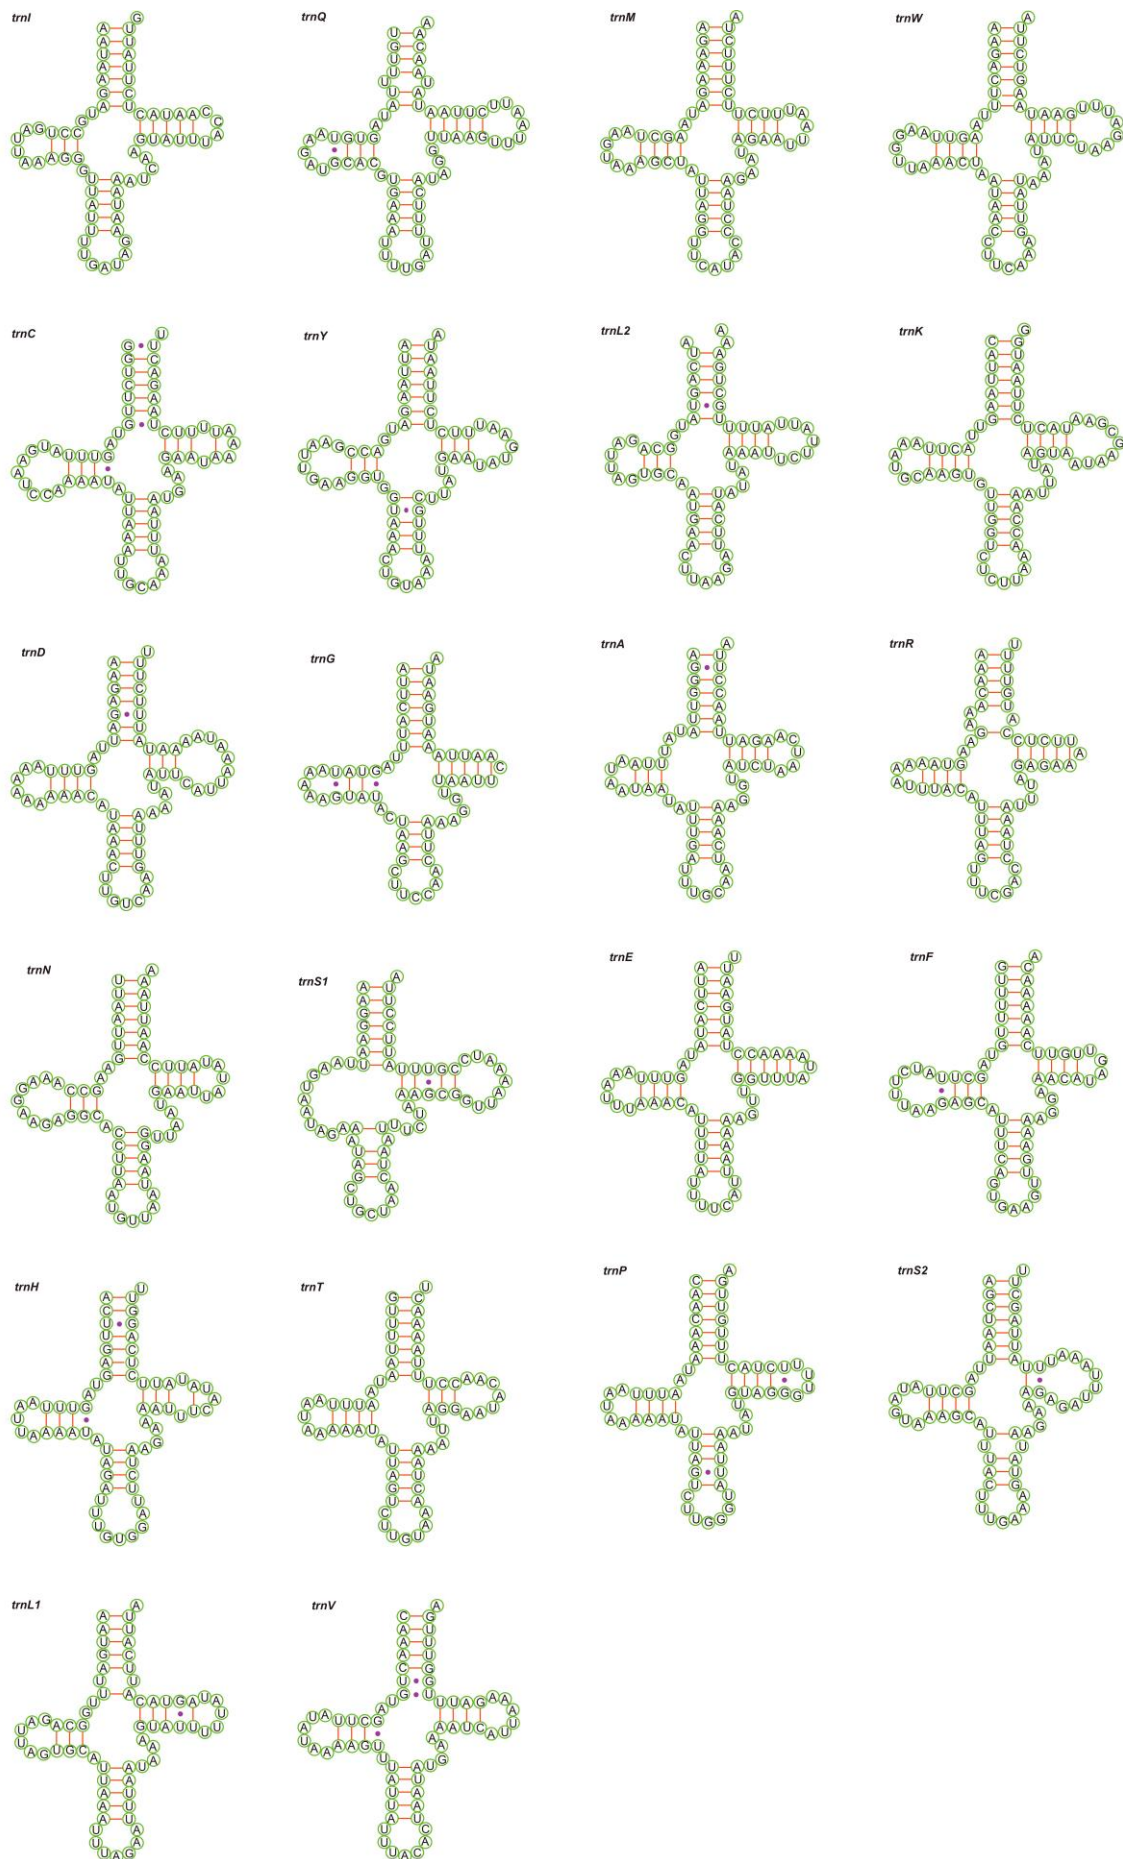

Figure S6. Predicted secondary structures of tRNA genes of *Doratura stylata*.



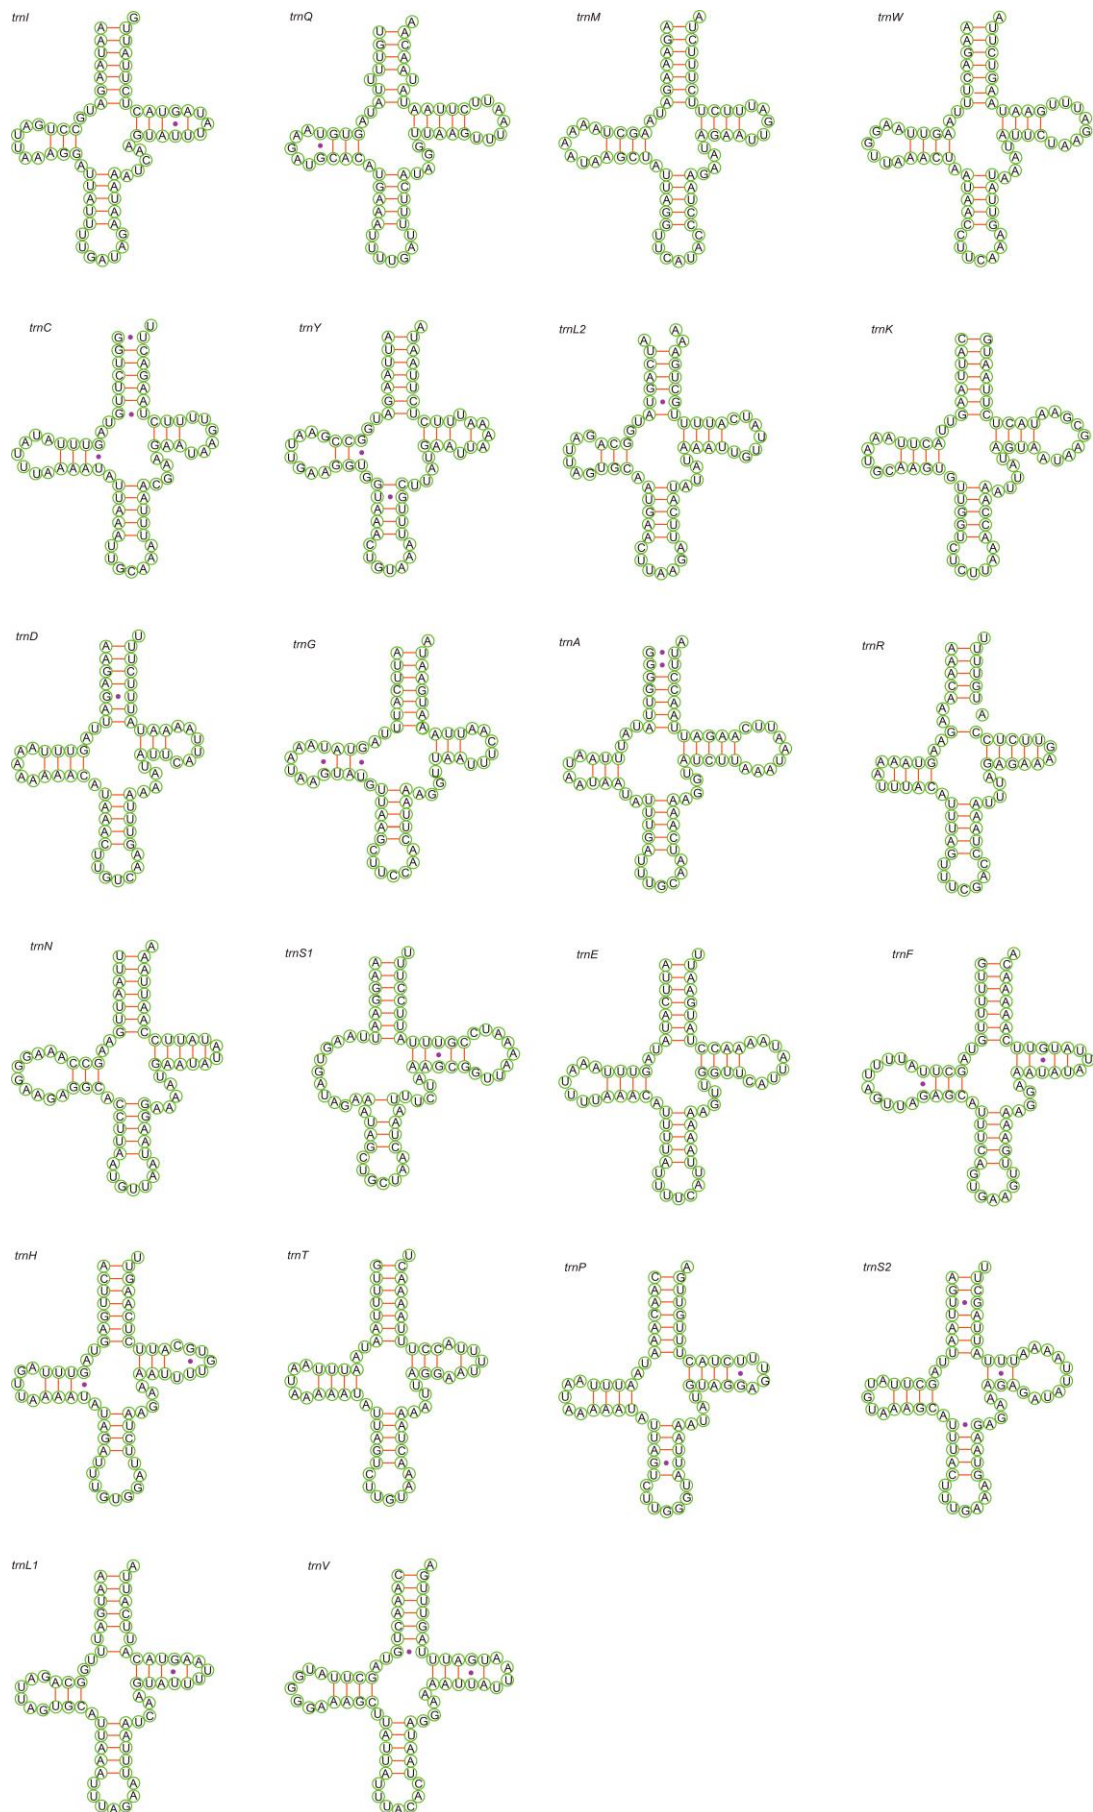

**Figure S7.** Predicted secondary structures of tRNA genes of *Doratura homophyla*.

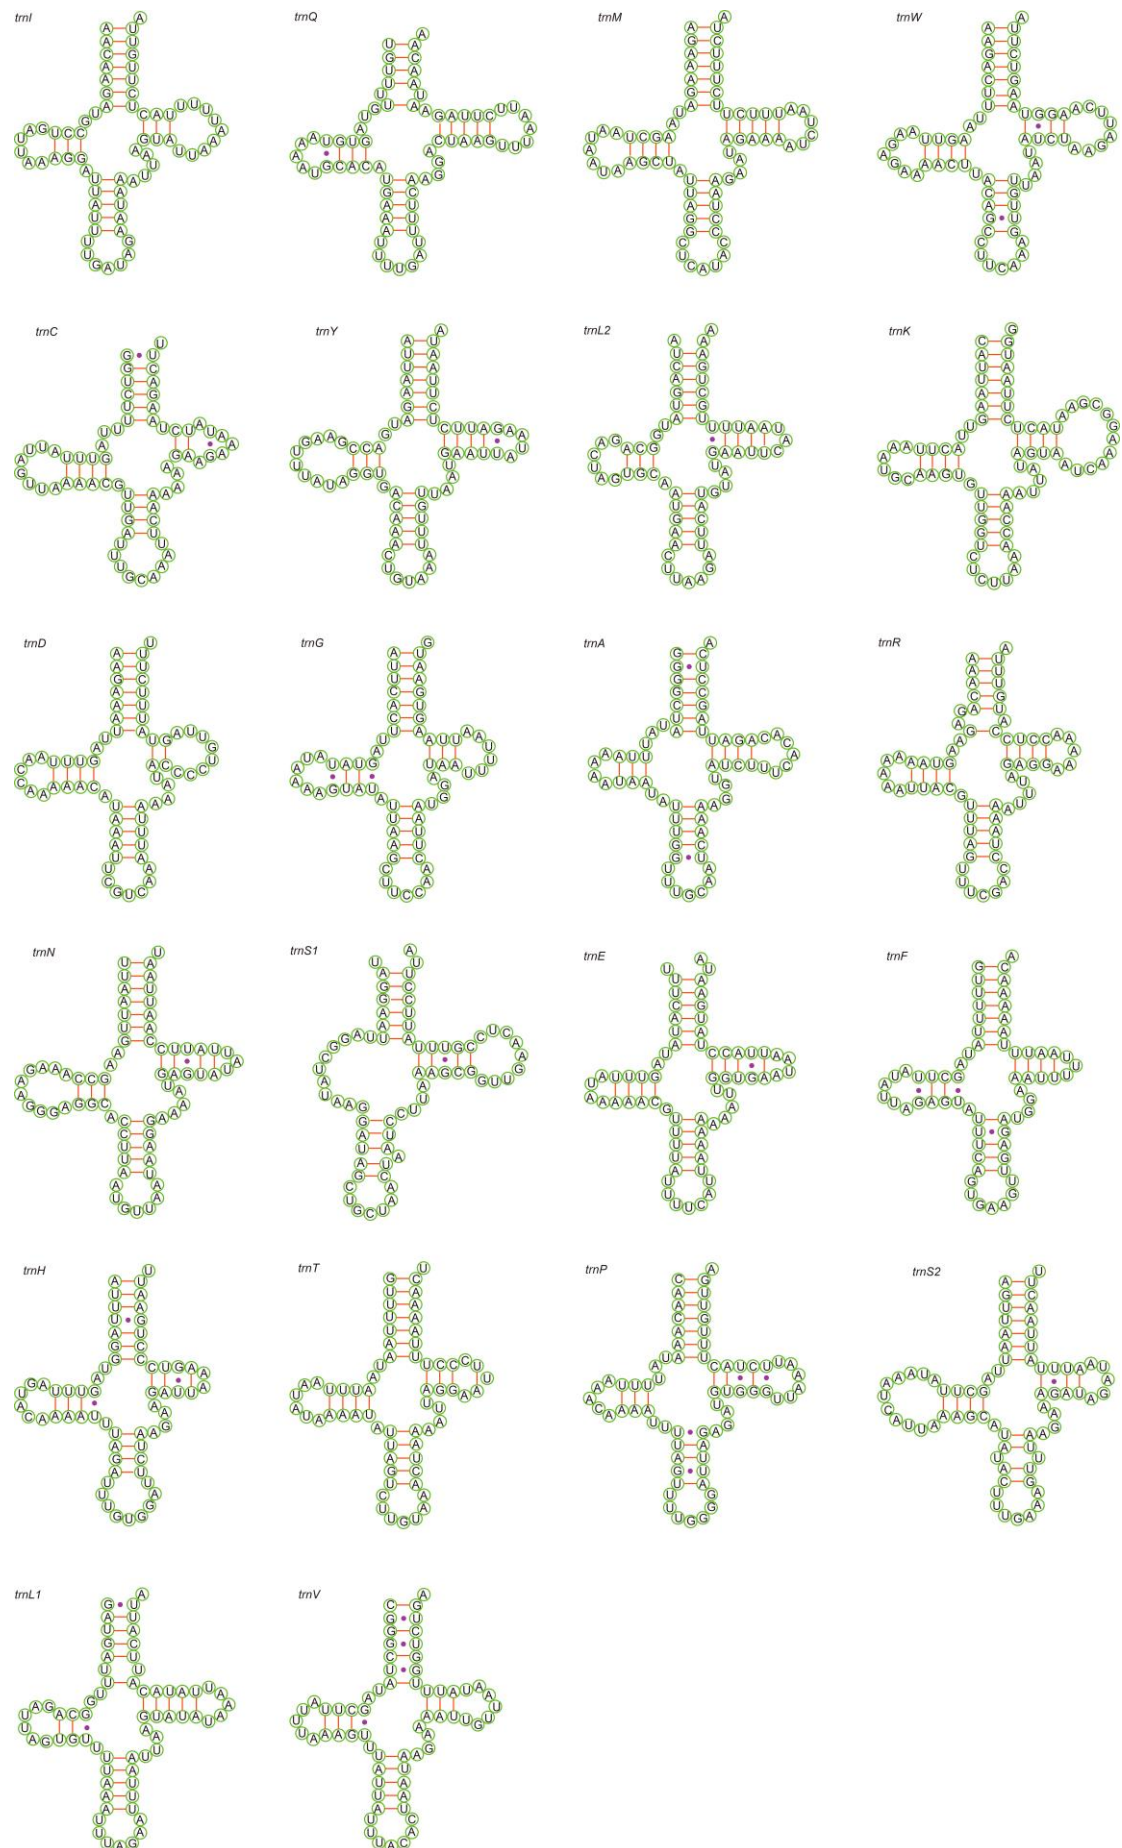

**Figure S8.** Predicted secondary structures of tRNA genes of *Gurawa minorcephala*.



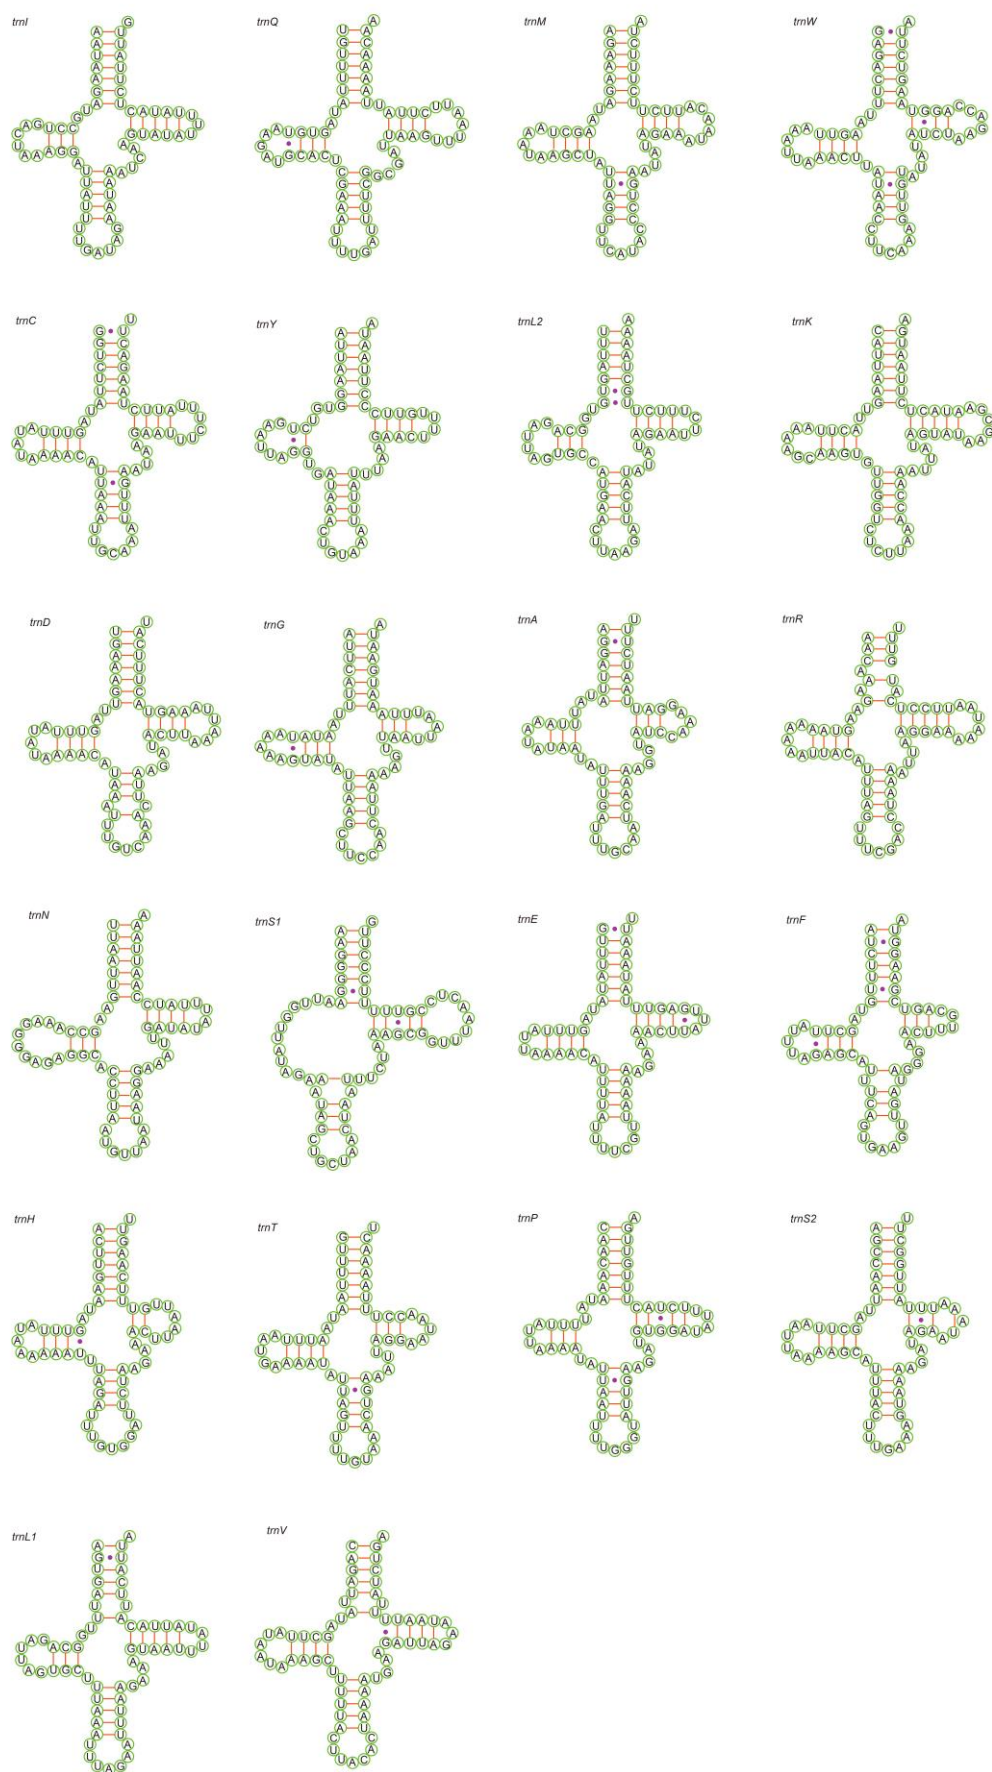

**Figure S9.** Predicted secondary structures of tRNA genes of *Leofa pulchella*.

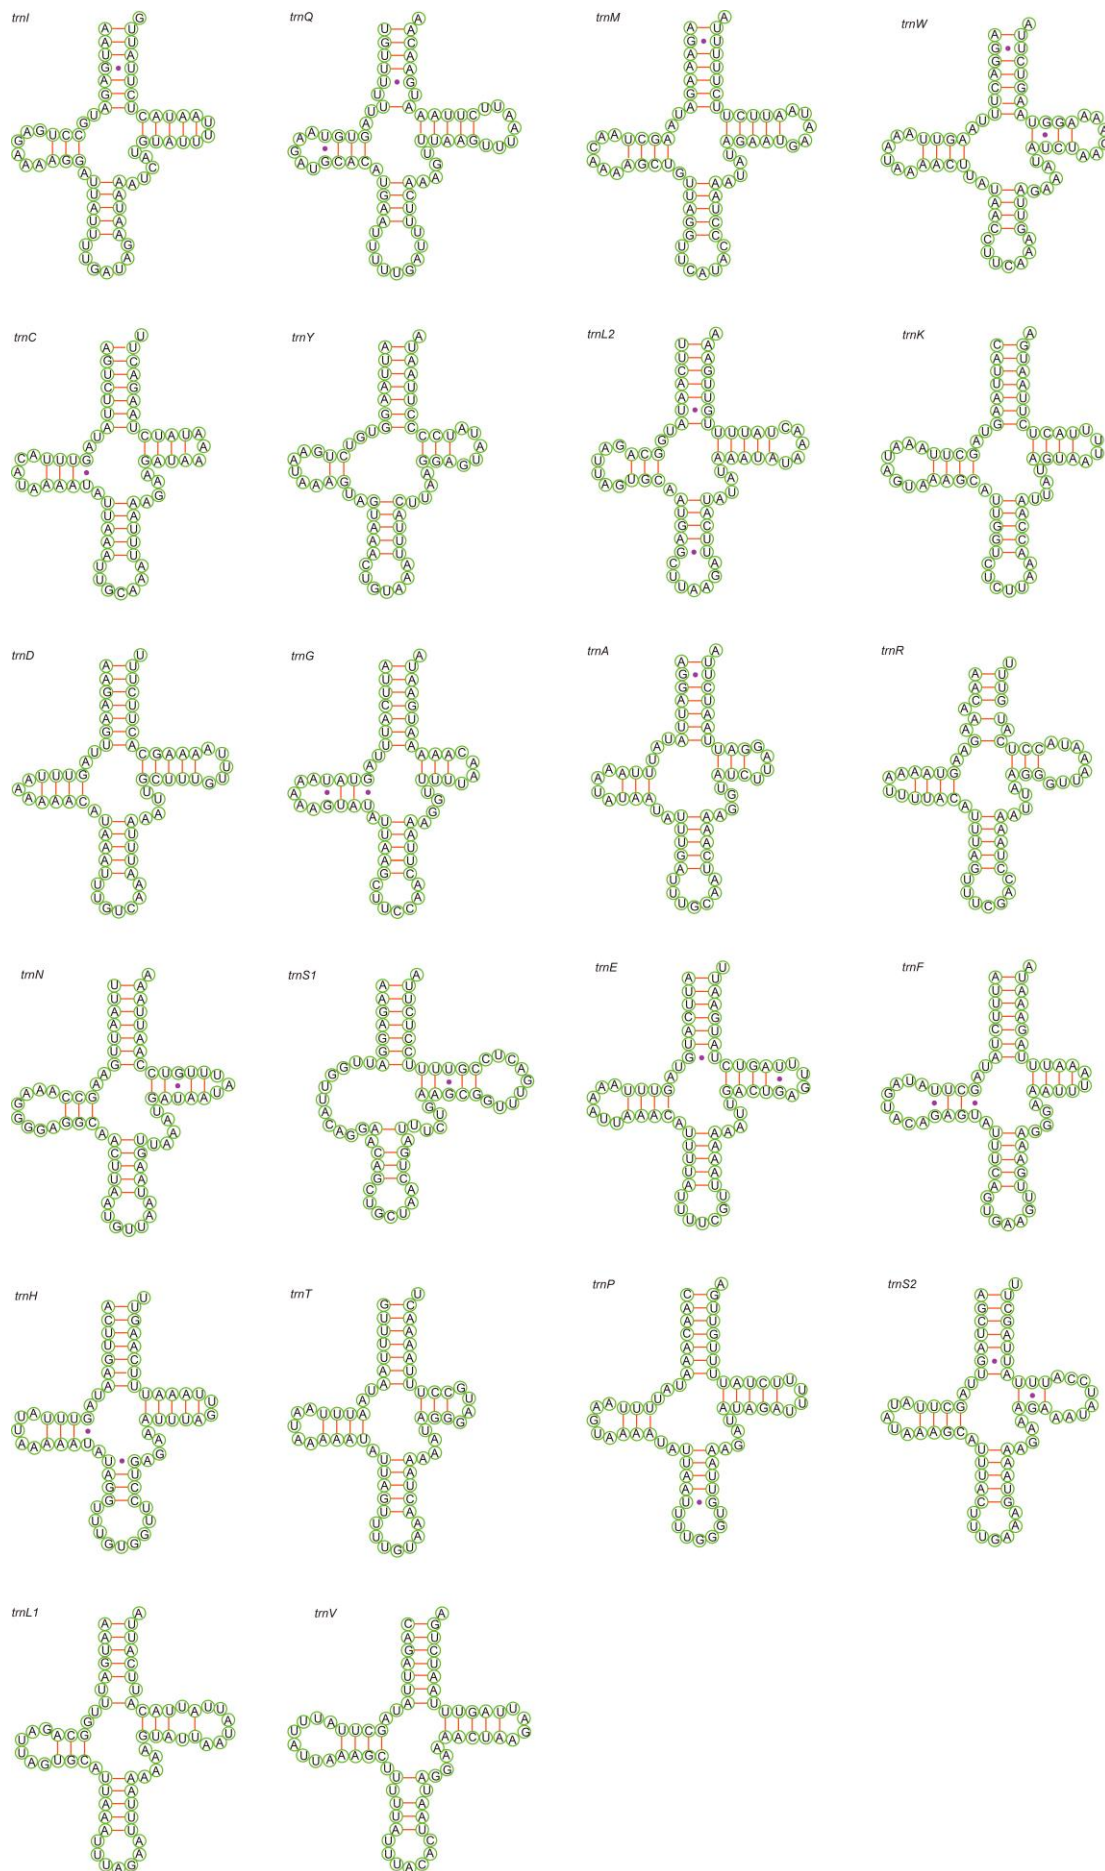

**Figure S10.** Predicted secondary structures of tRNA genes of *Nephotettix malayanus*.

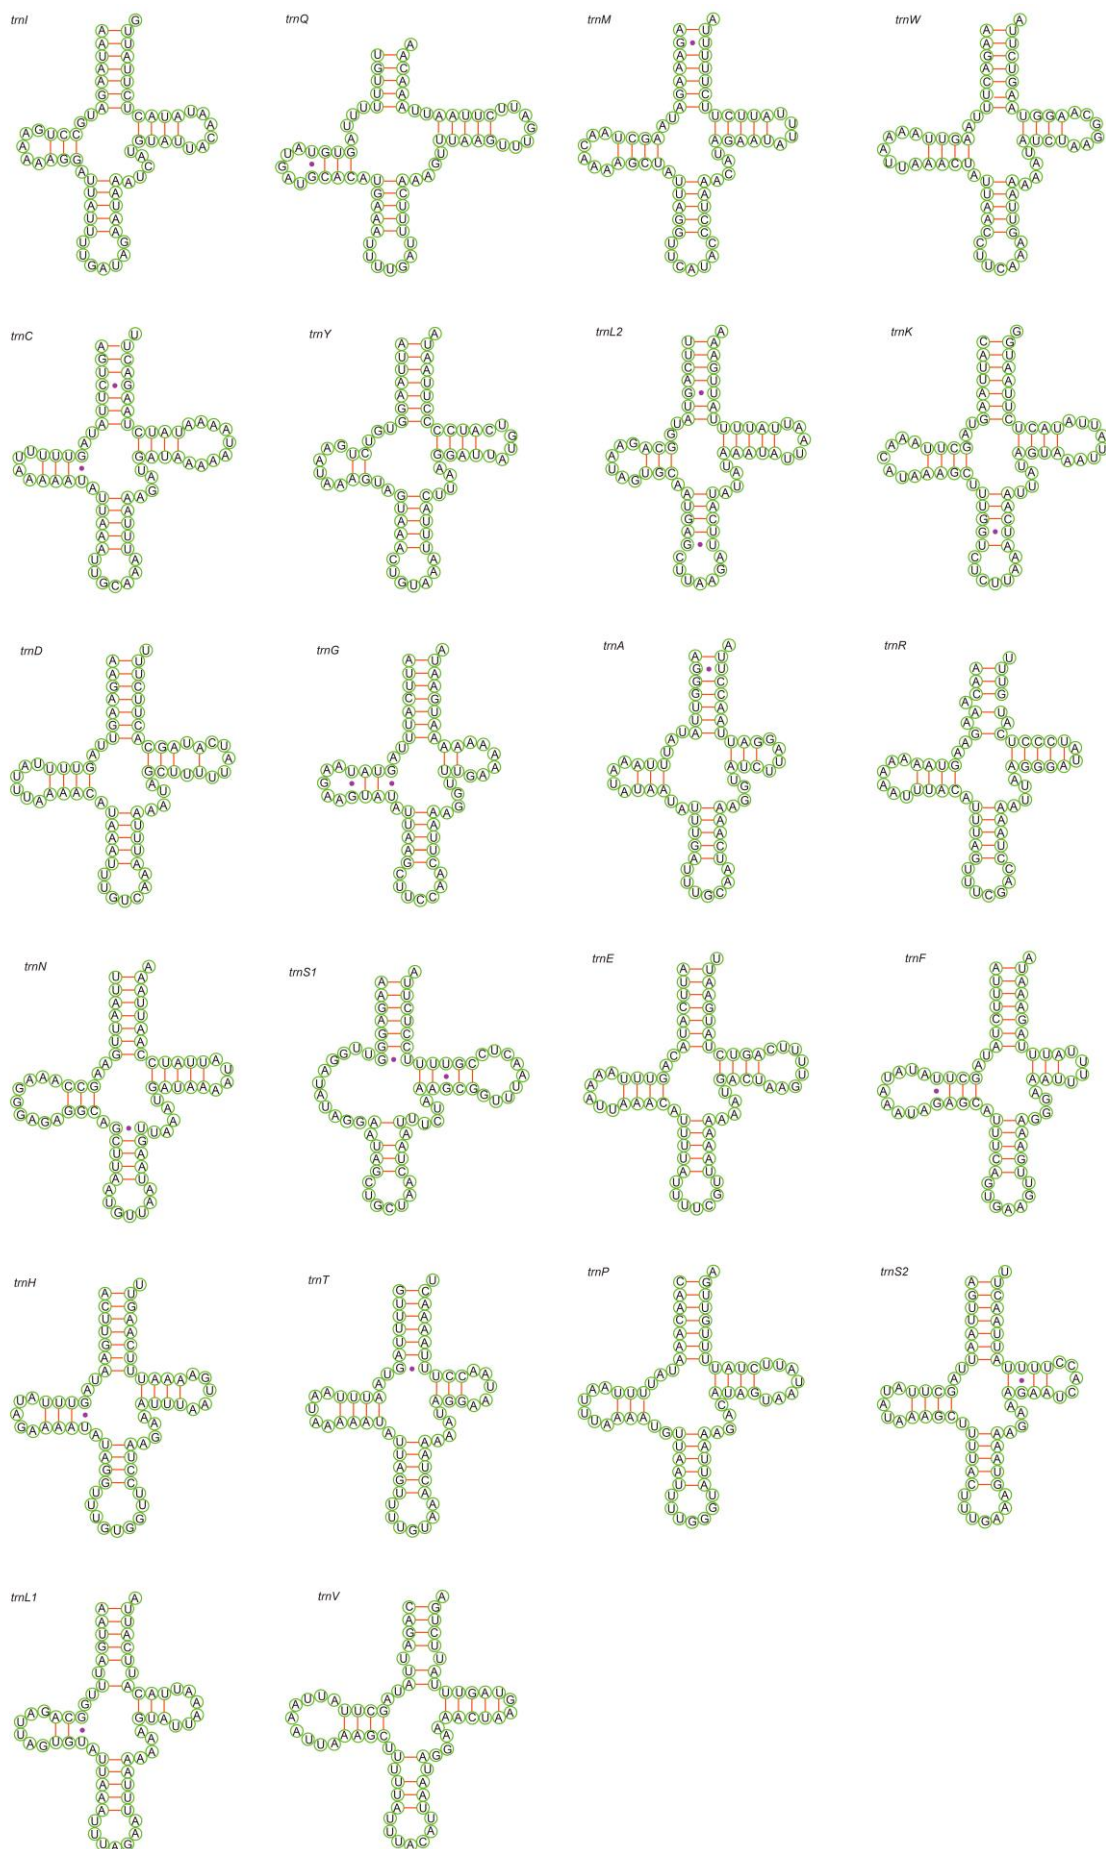

**Figure S11.** Predicted secondary structures of tRNA genes of *Nephrotettix nigropictus*.



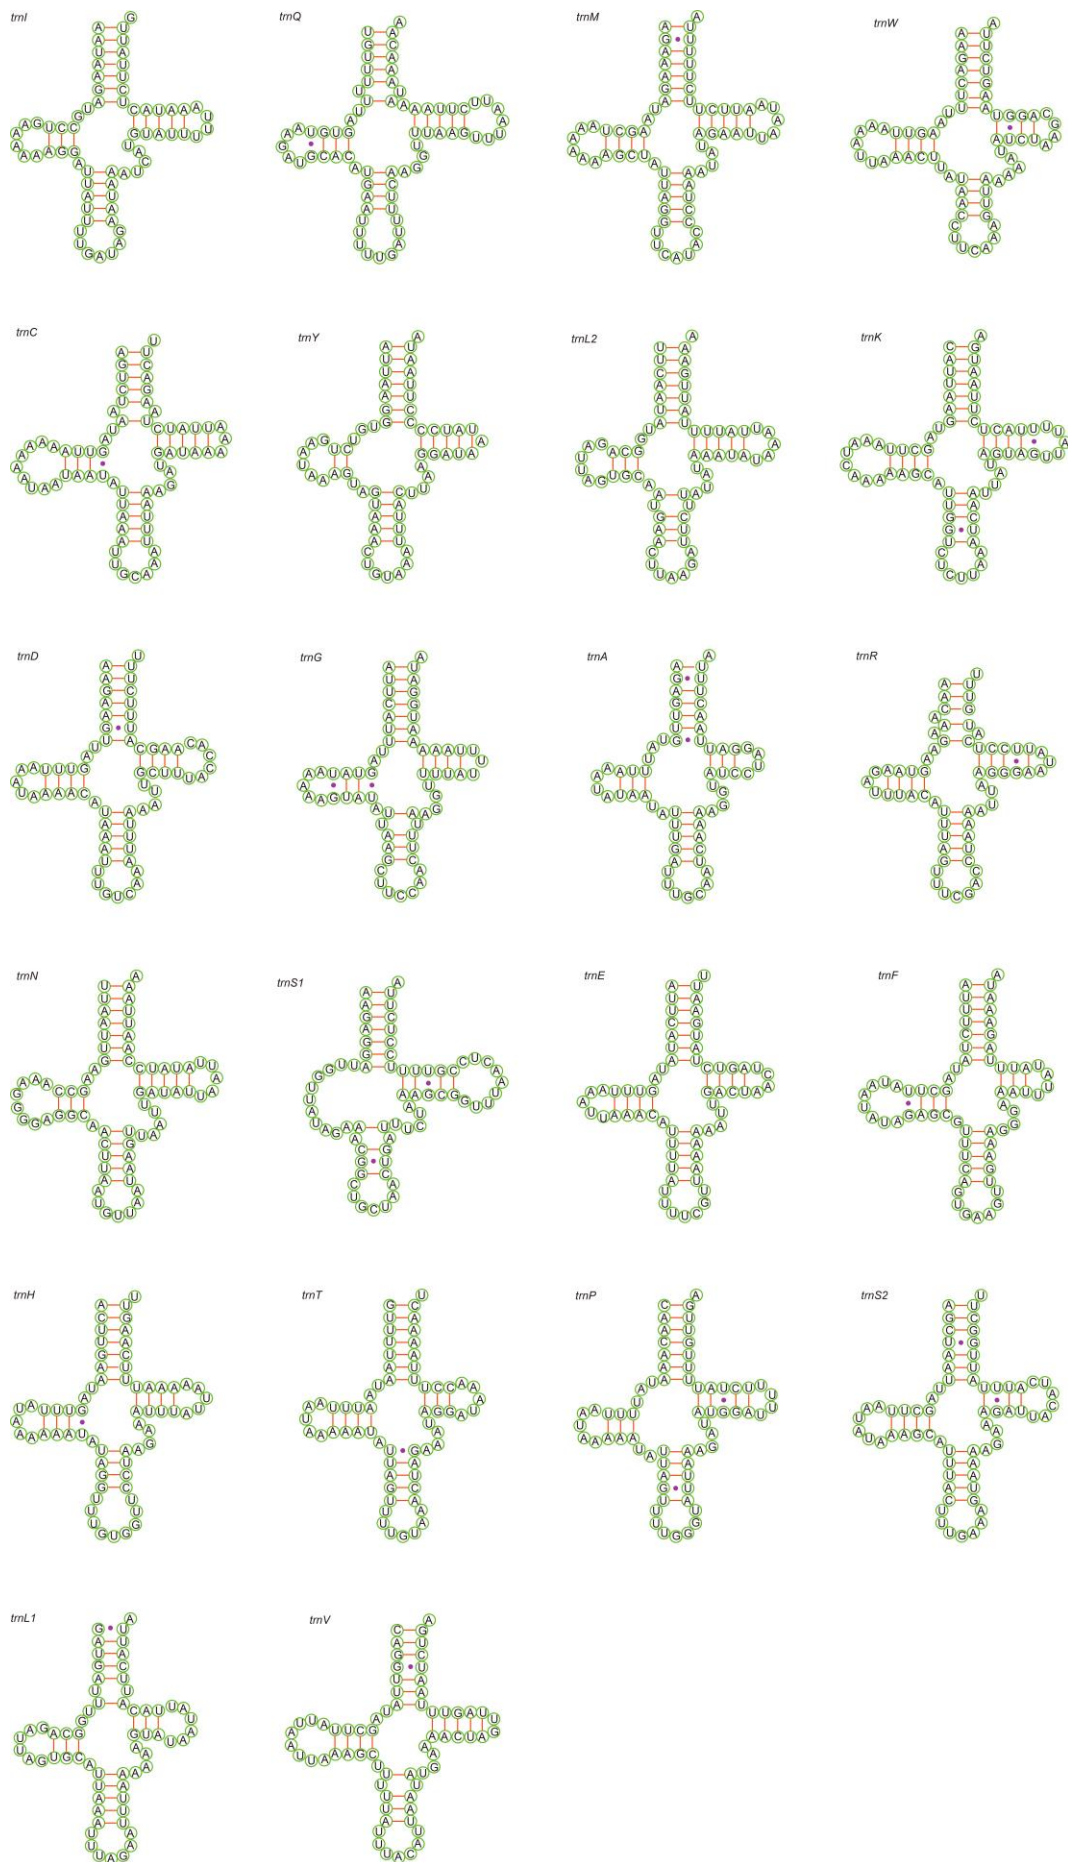

**Figure S12.** Predicted secondary structures of tRNA genes of *Nephotettix parvus*.

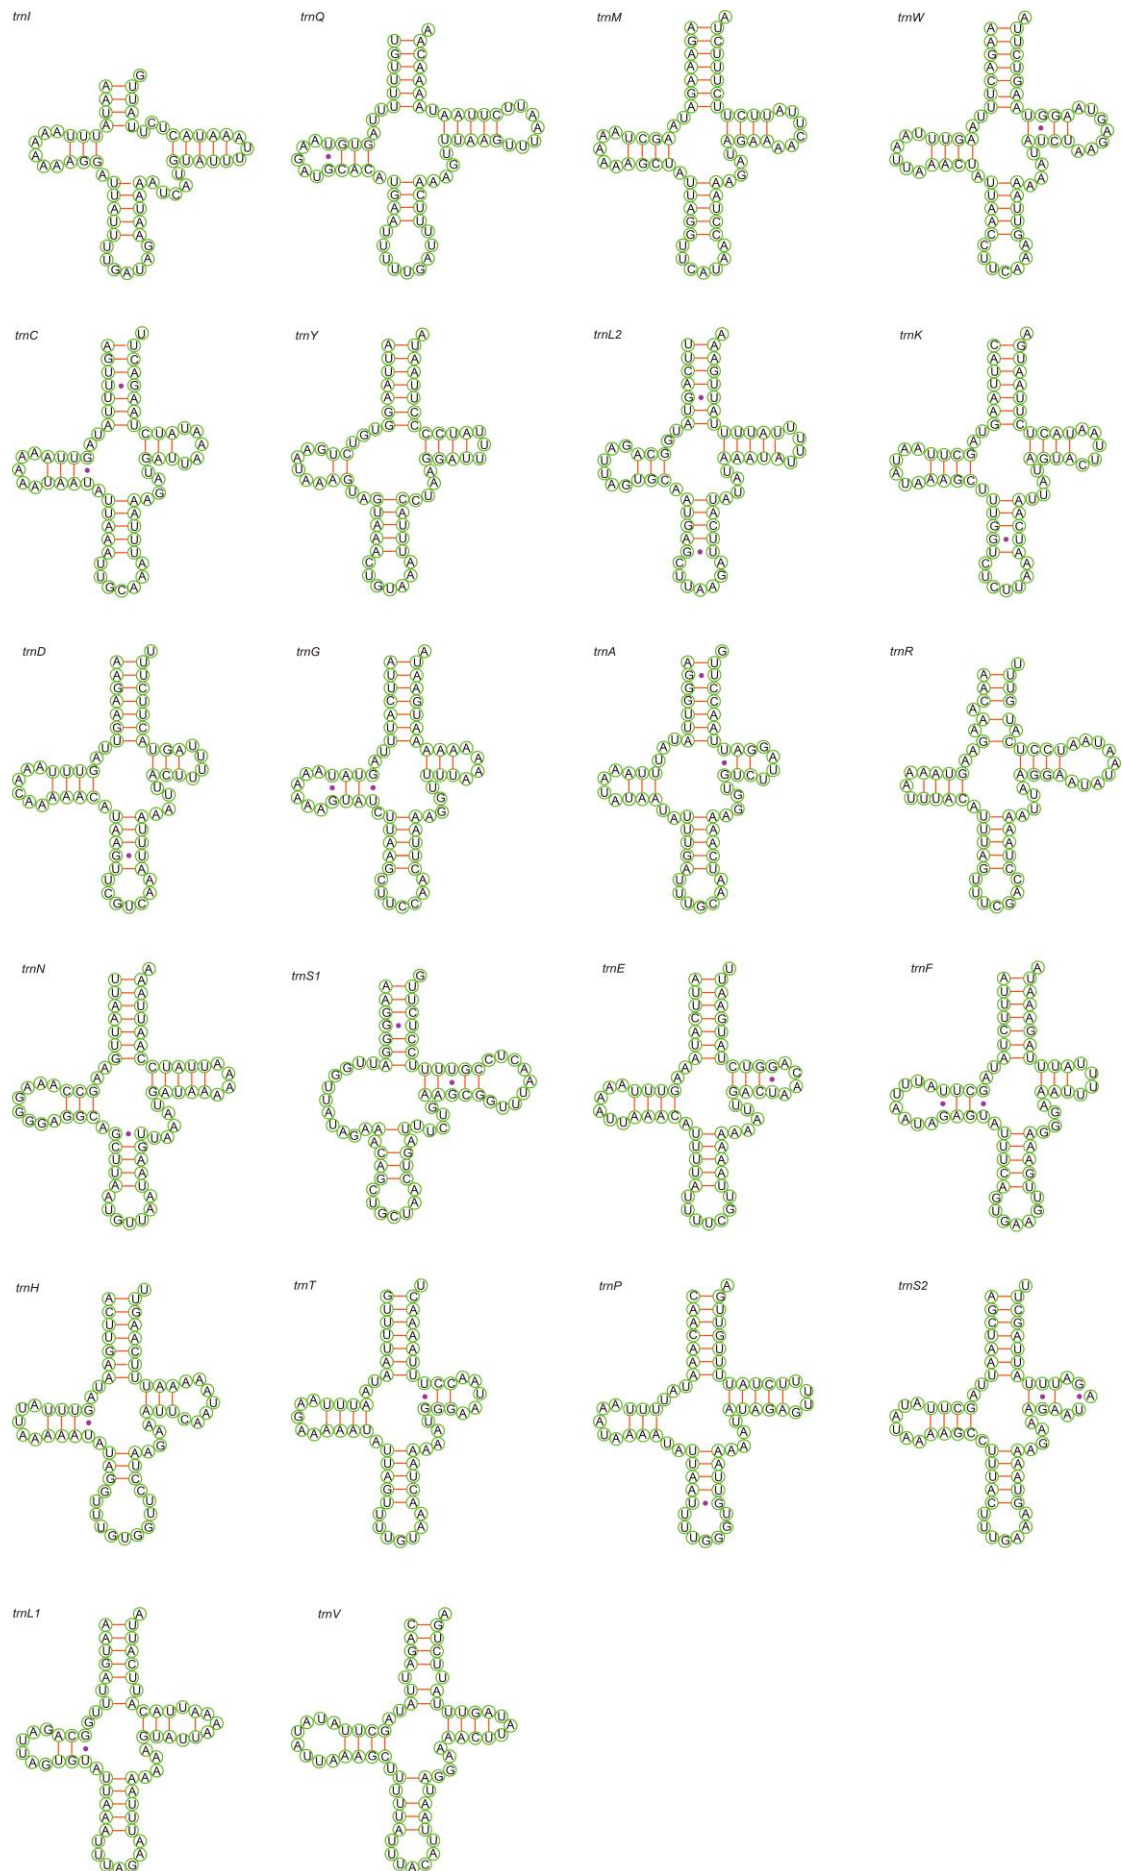

**Figure S13.** Predicted secondary structures of tRNA genes of *Nephrotettix virescens*.

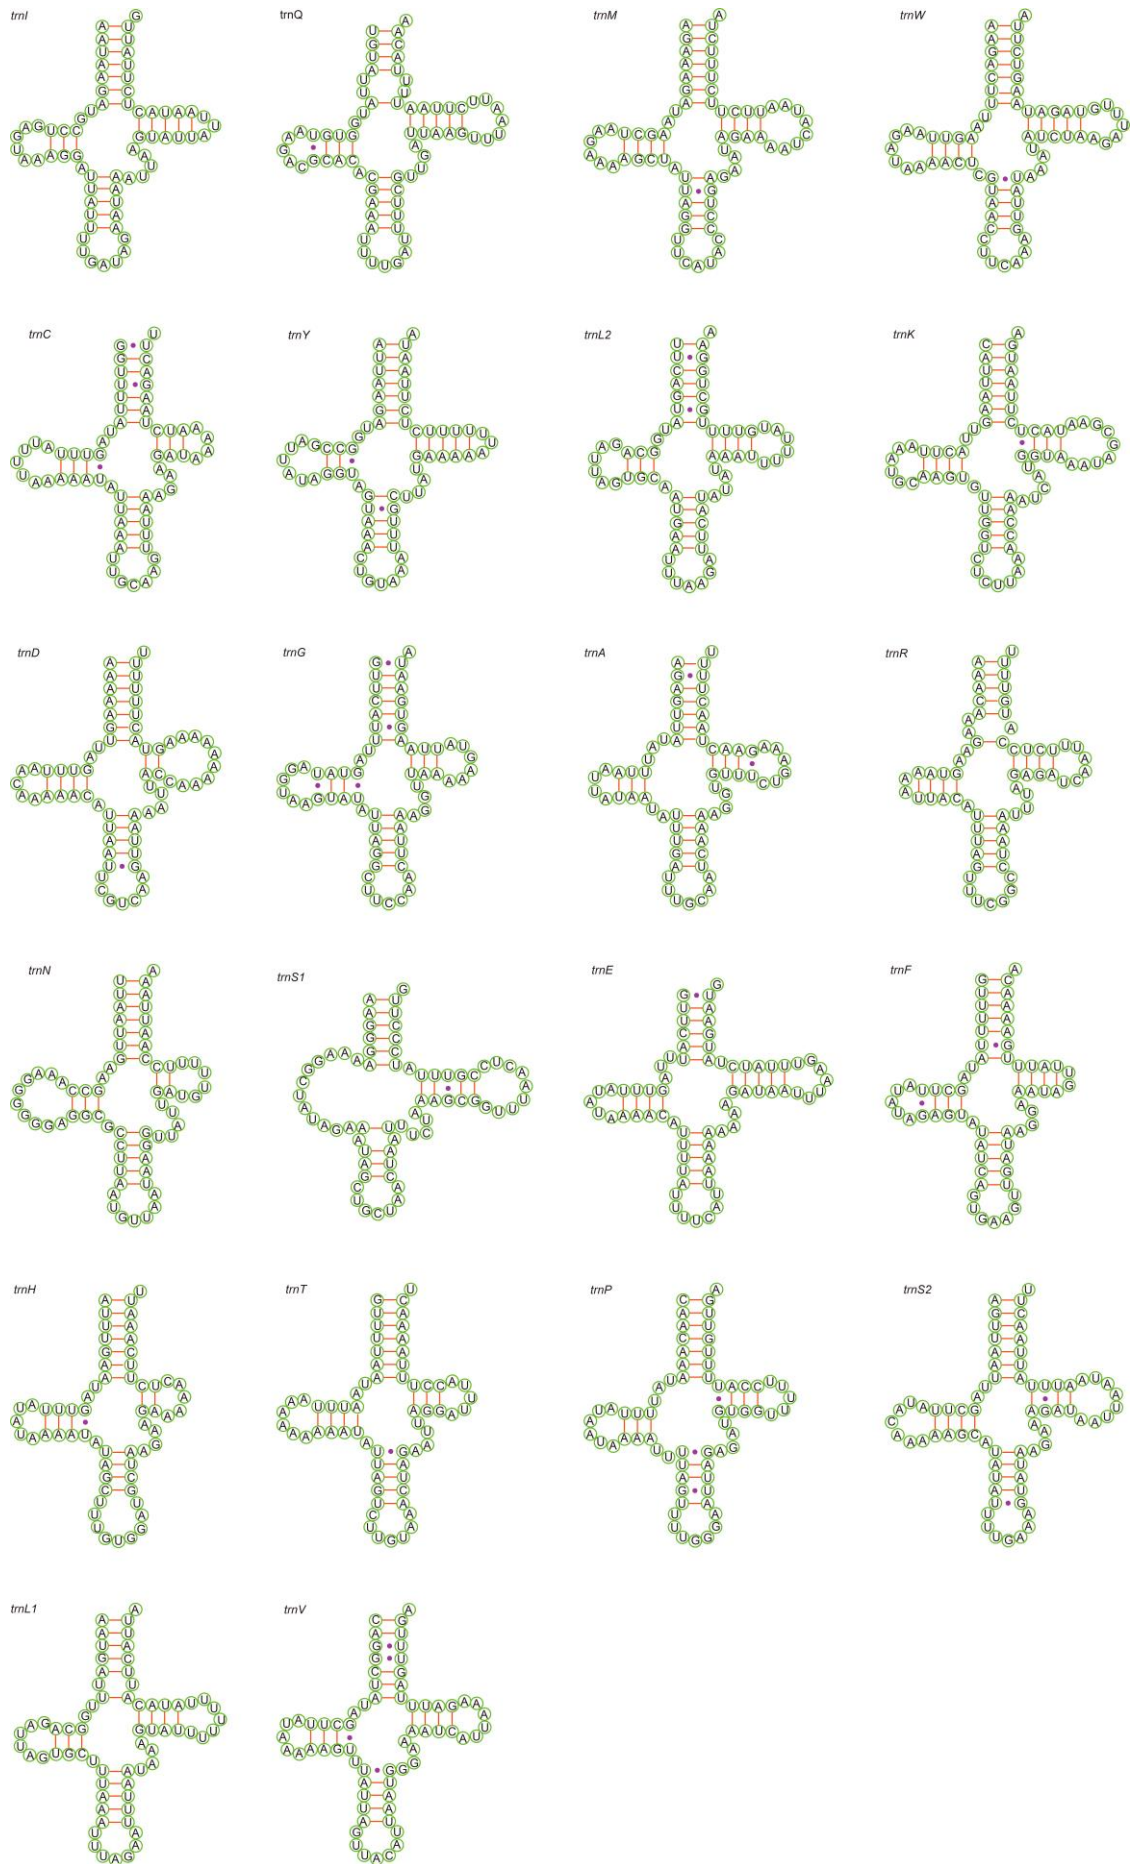

**Figure S14.** Predicted secondary structures of tRNA genes of *Zahniserius cylindricus*.



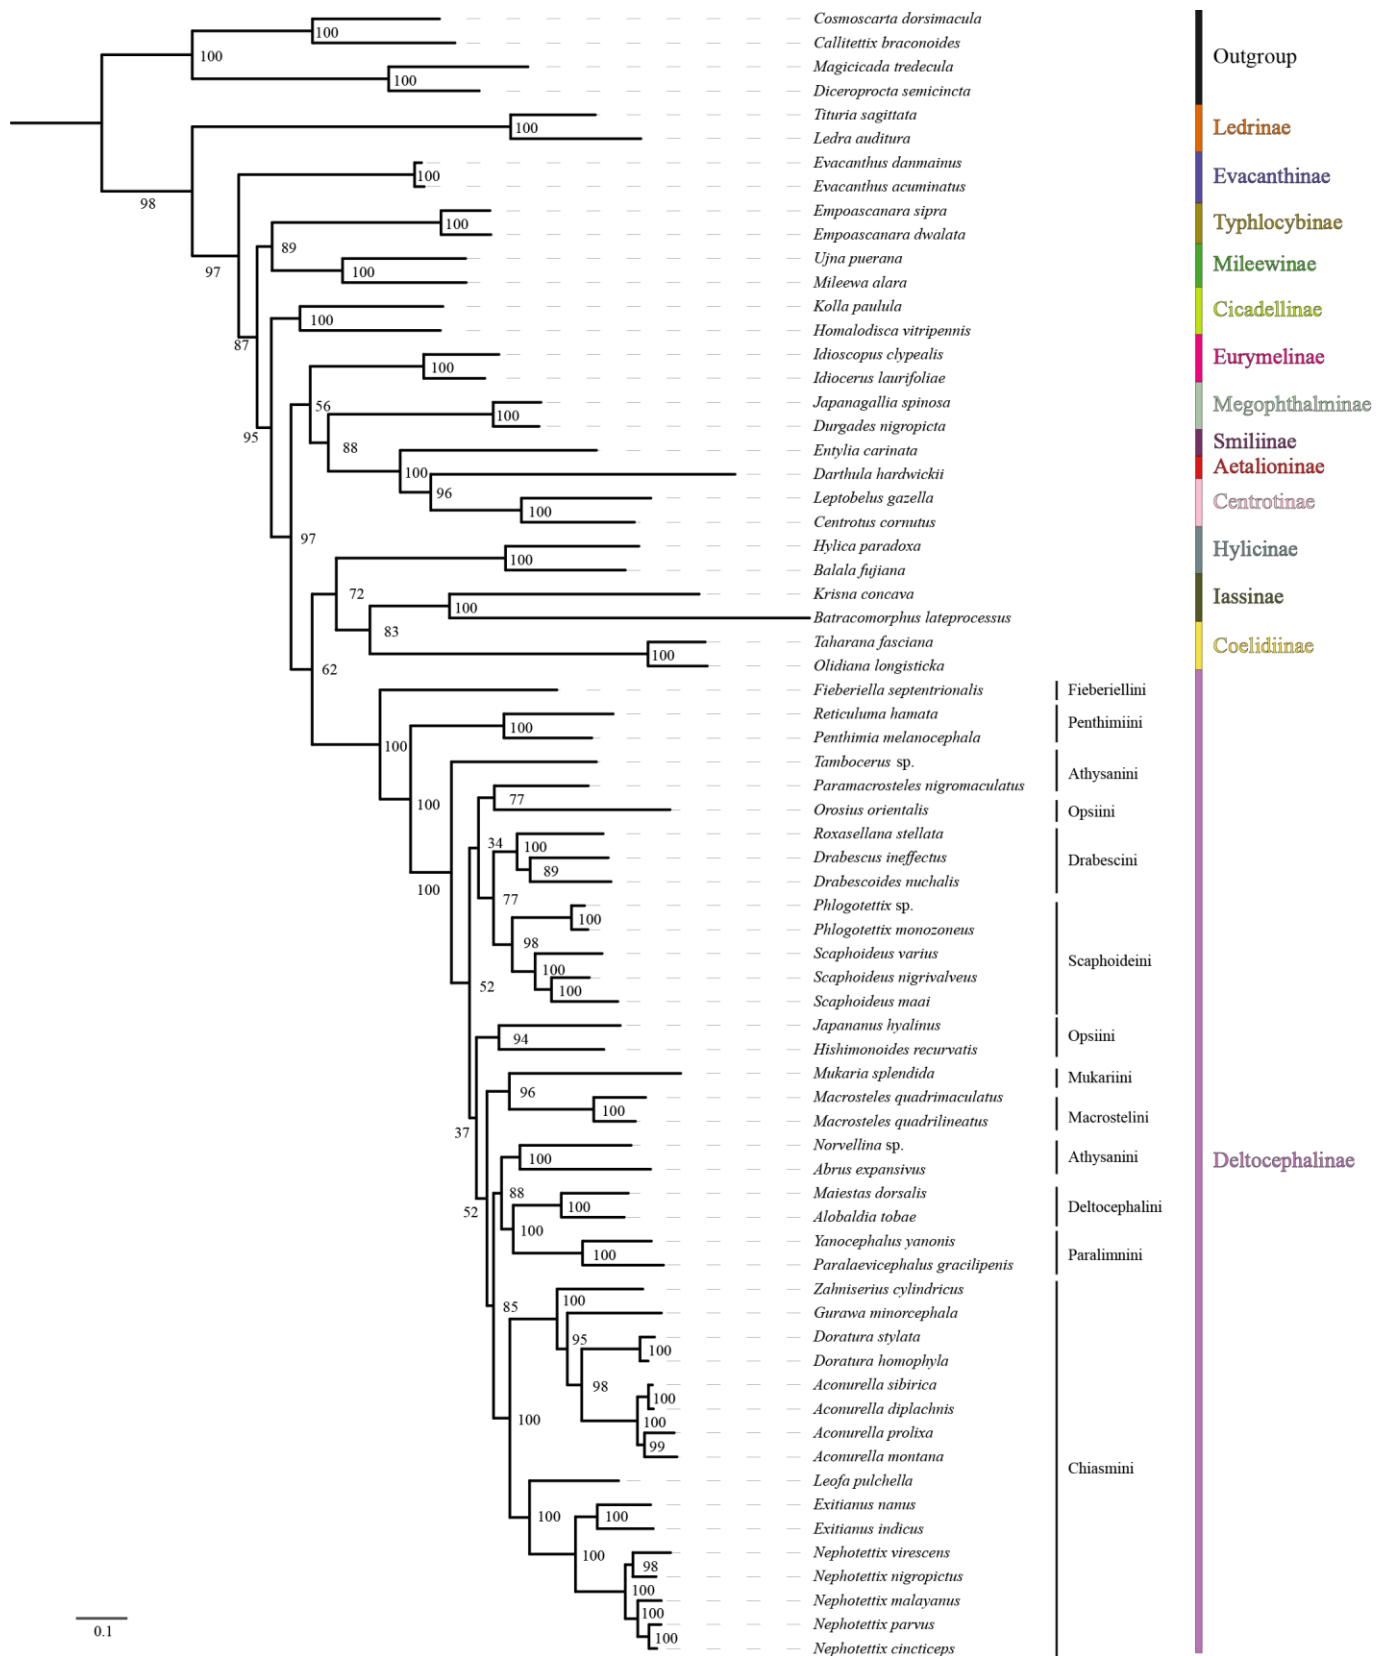

**Figure S15.** The phylogenetic relationships using the maximum likelihood (ML) analysis method based on the AA datasets. Numbers on each node correspond to the bootstrap values.

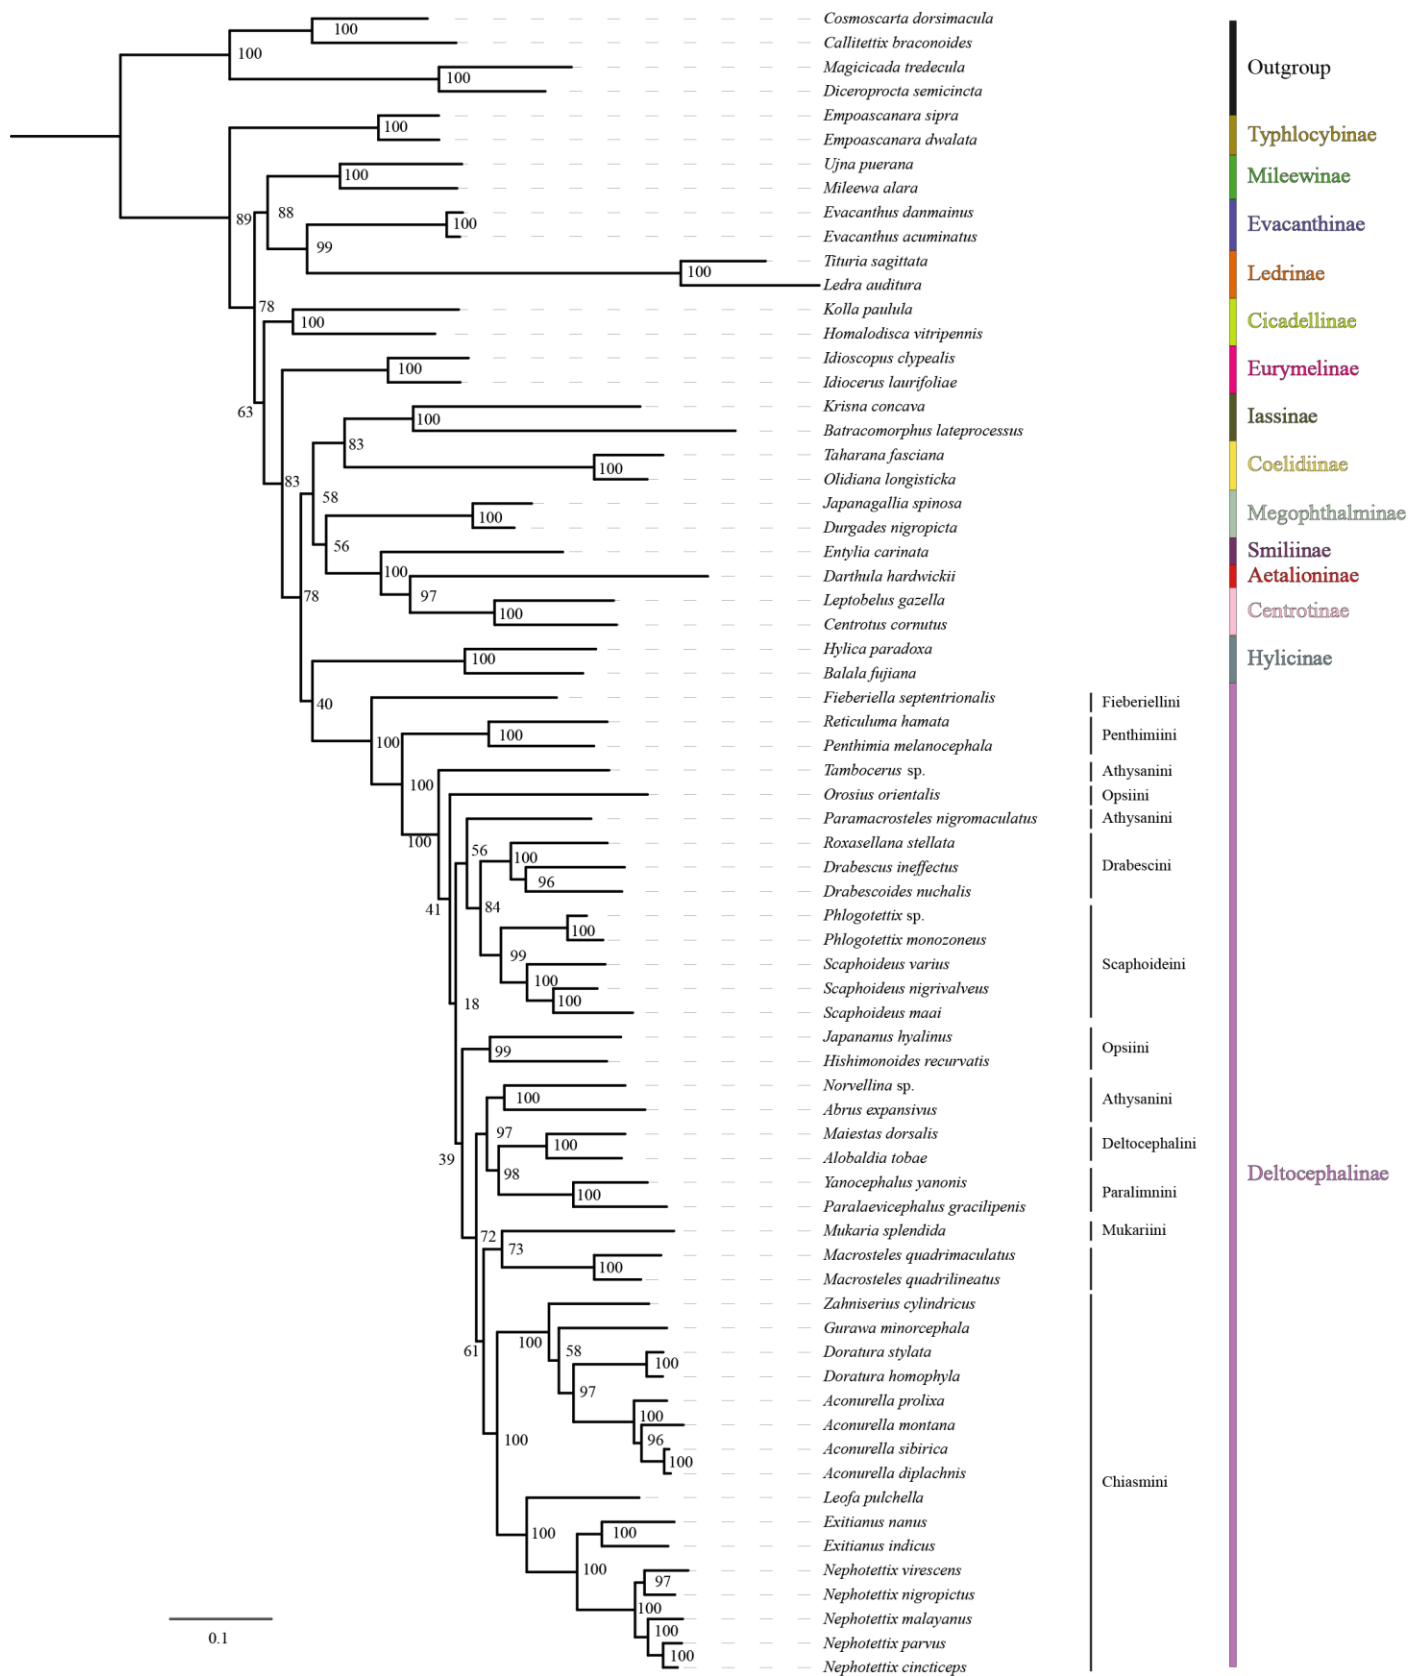

**Figure S16.** The phylogenetic relationships using the maximum likelihood (ML) analysis method based on the PCG12 datasets. Numbers on each node correspond to the bootstrap values.

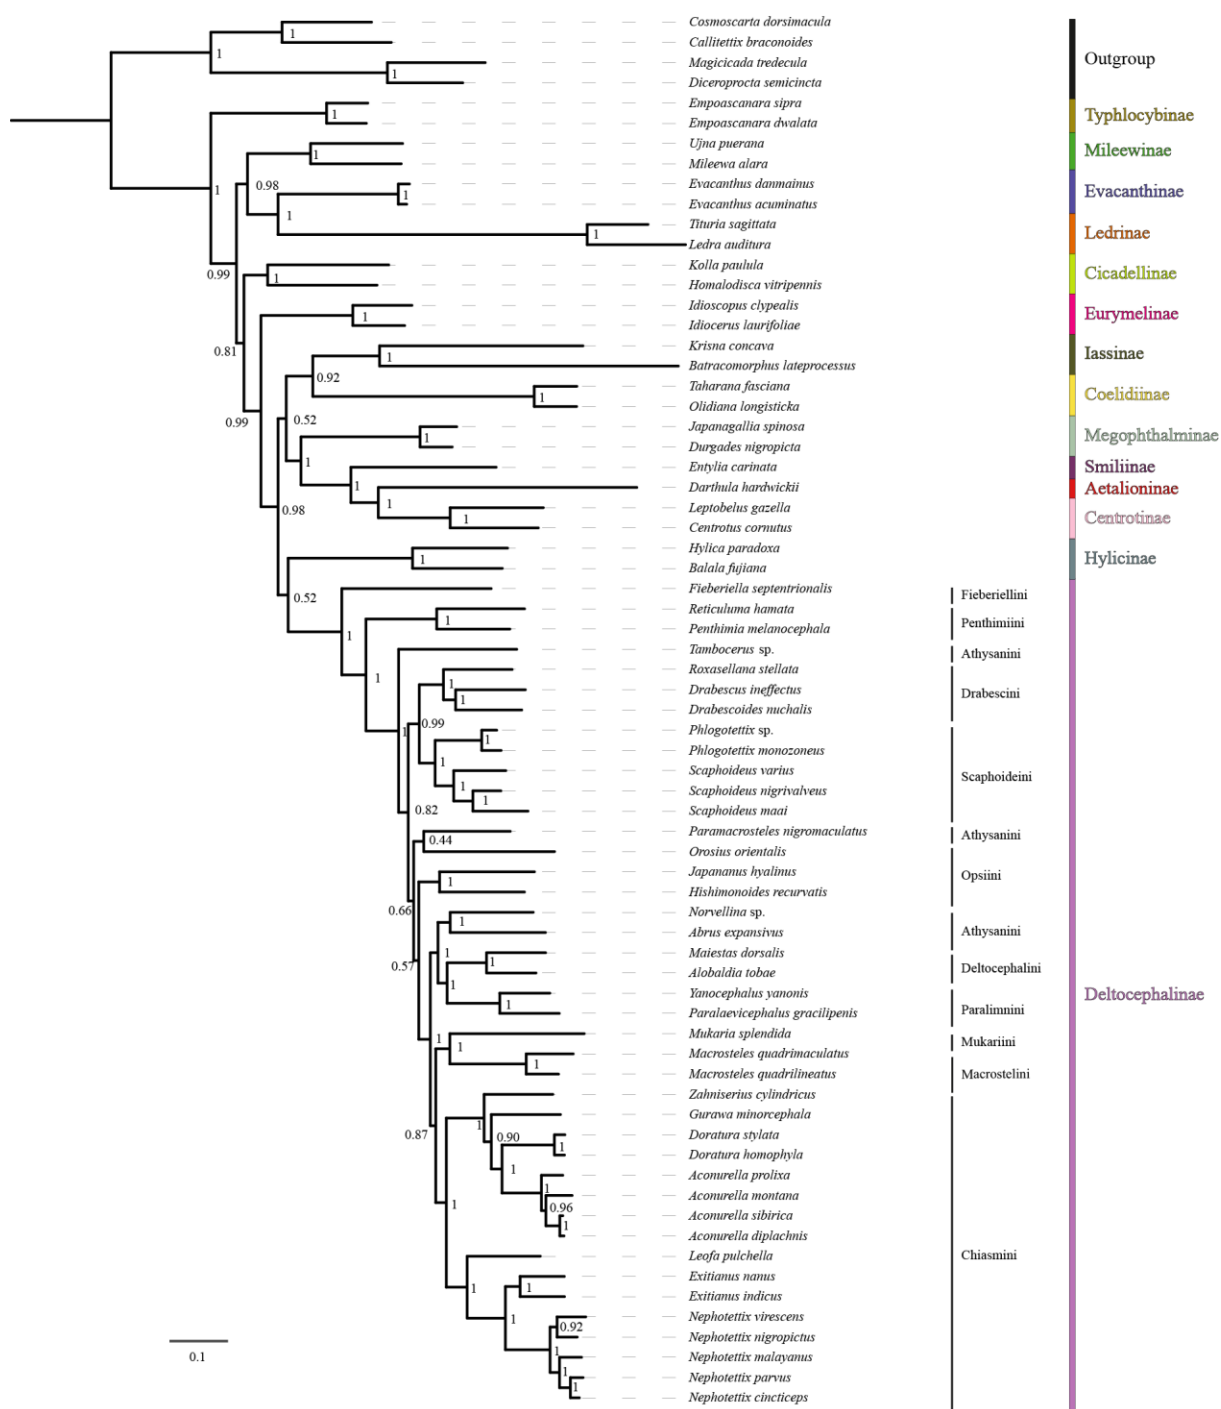

**Figure S17.** The phylogenetic relationships using the Bayesian inference (BI) analysis method based on the PCG12 datasets. Numbers on each node correspond to the posterior probability (PP) values.



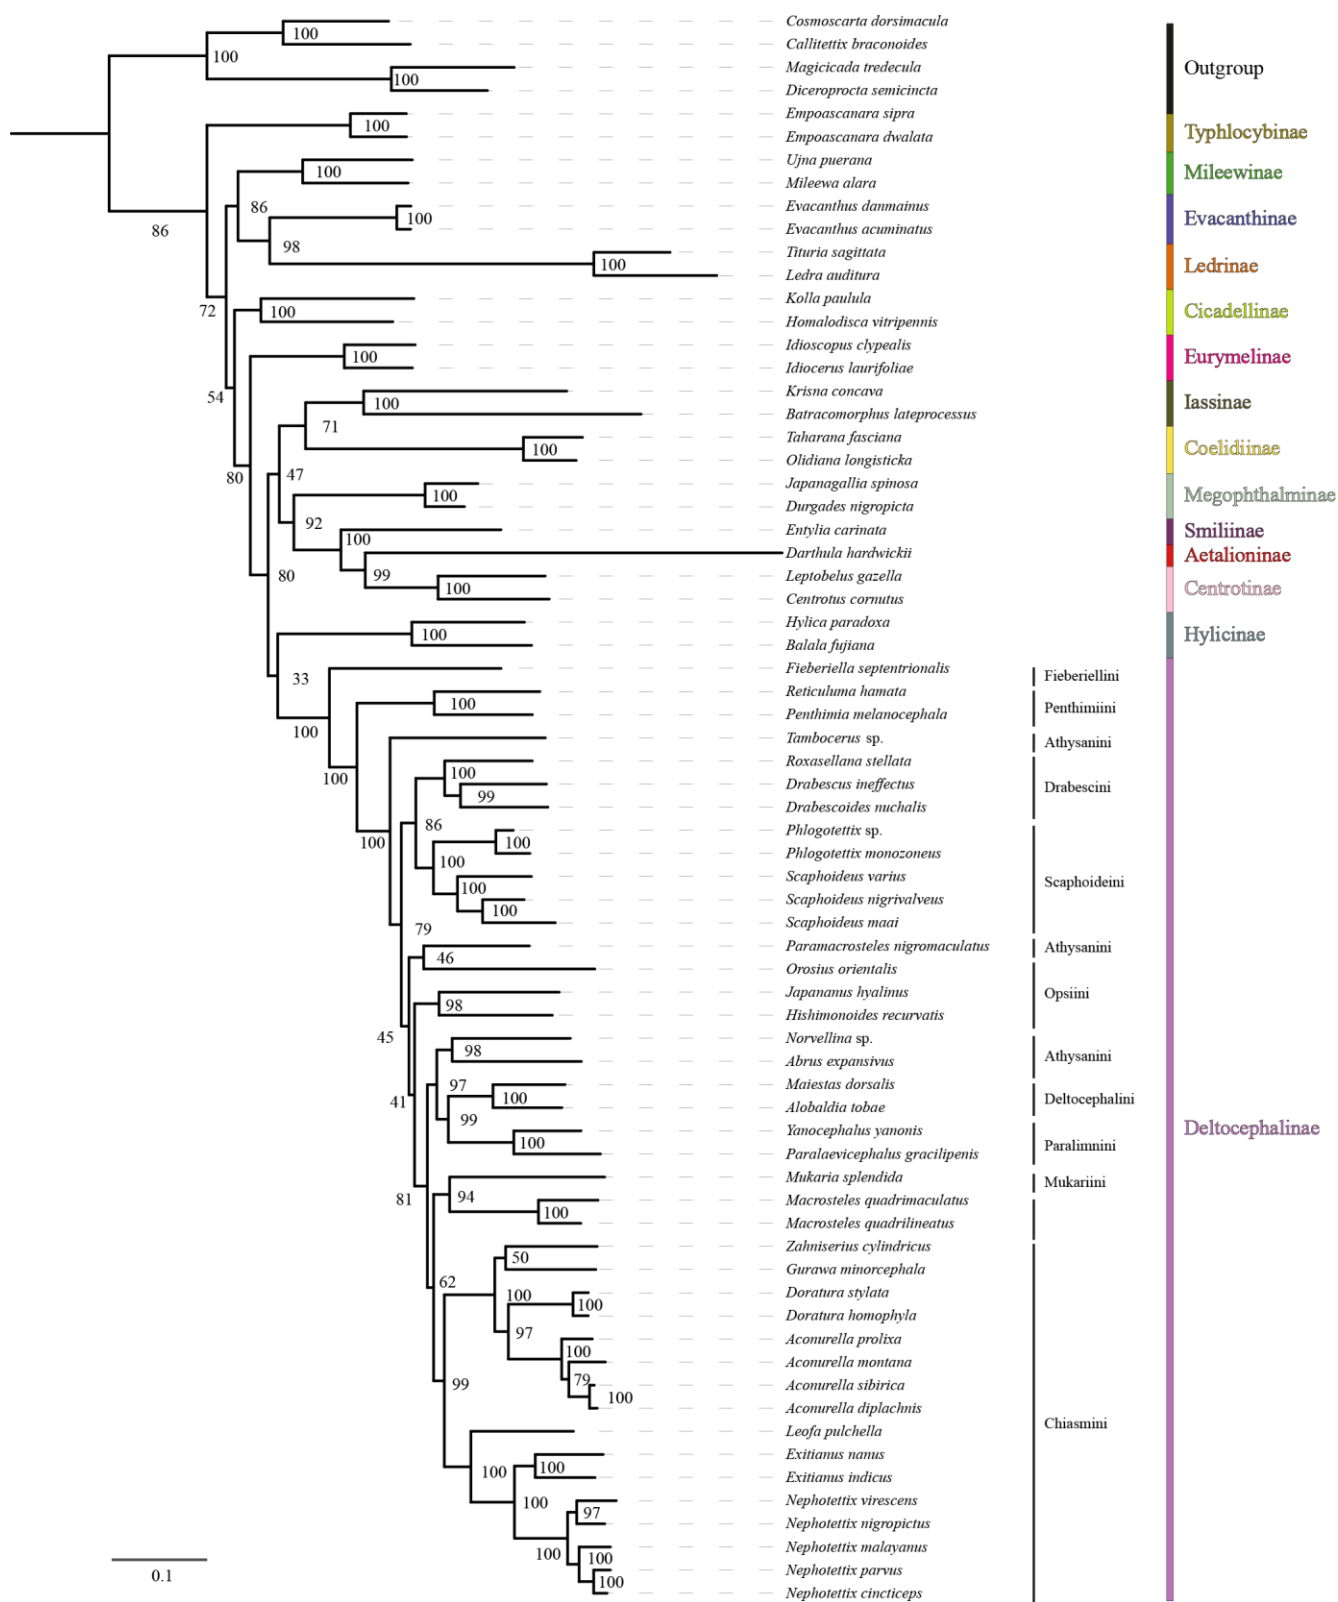

**Figure S18.** The phylogenetic relationships using the maximum likelihood (ML) analysis method based on the PCG12R datasets. Numbers on each node correspond to the bootstrap values.

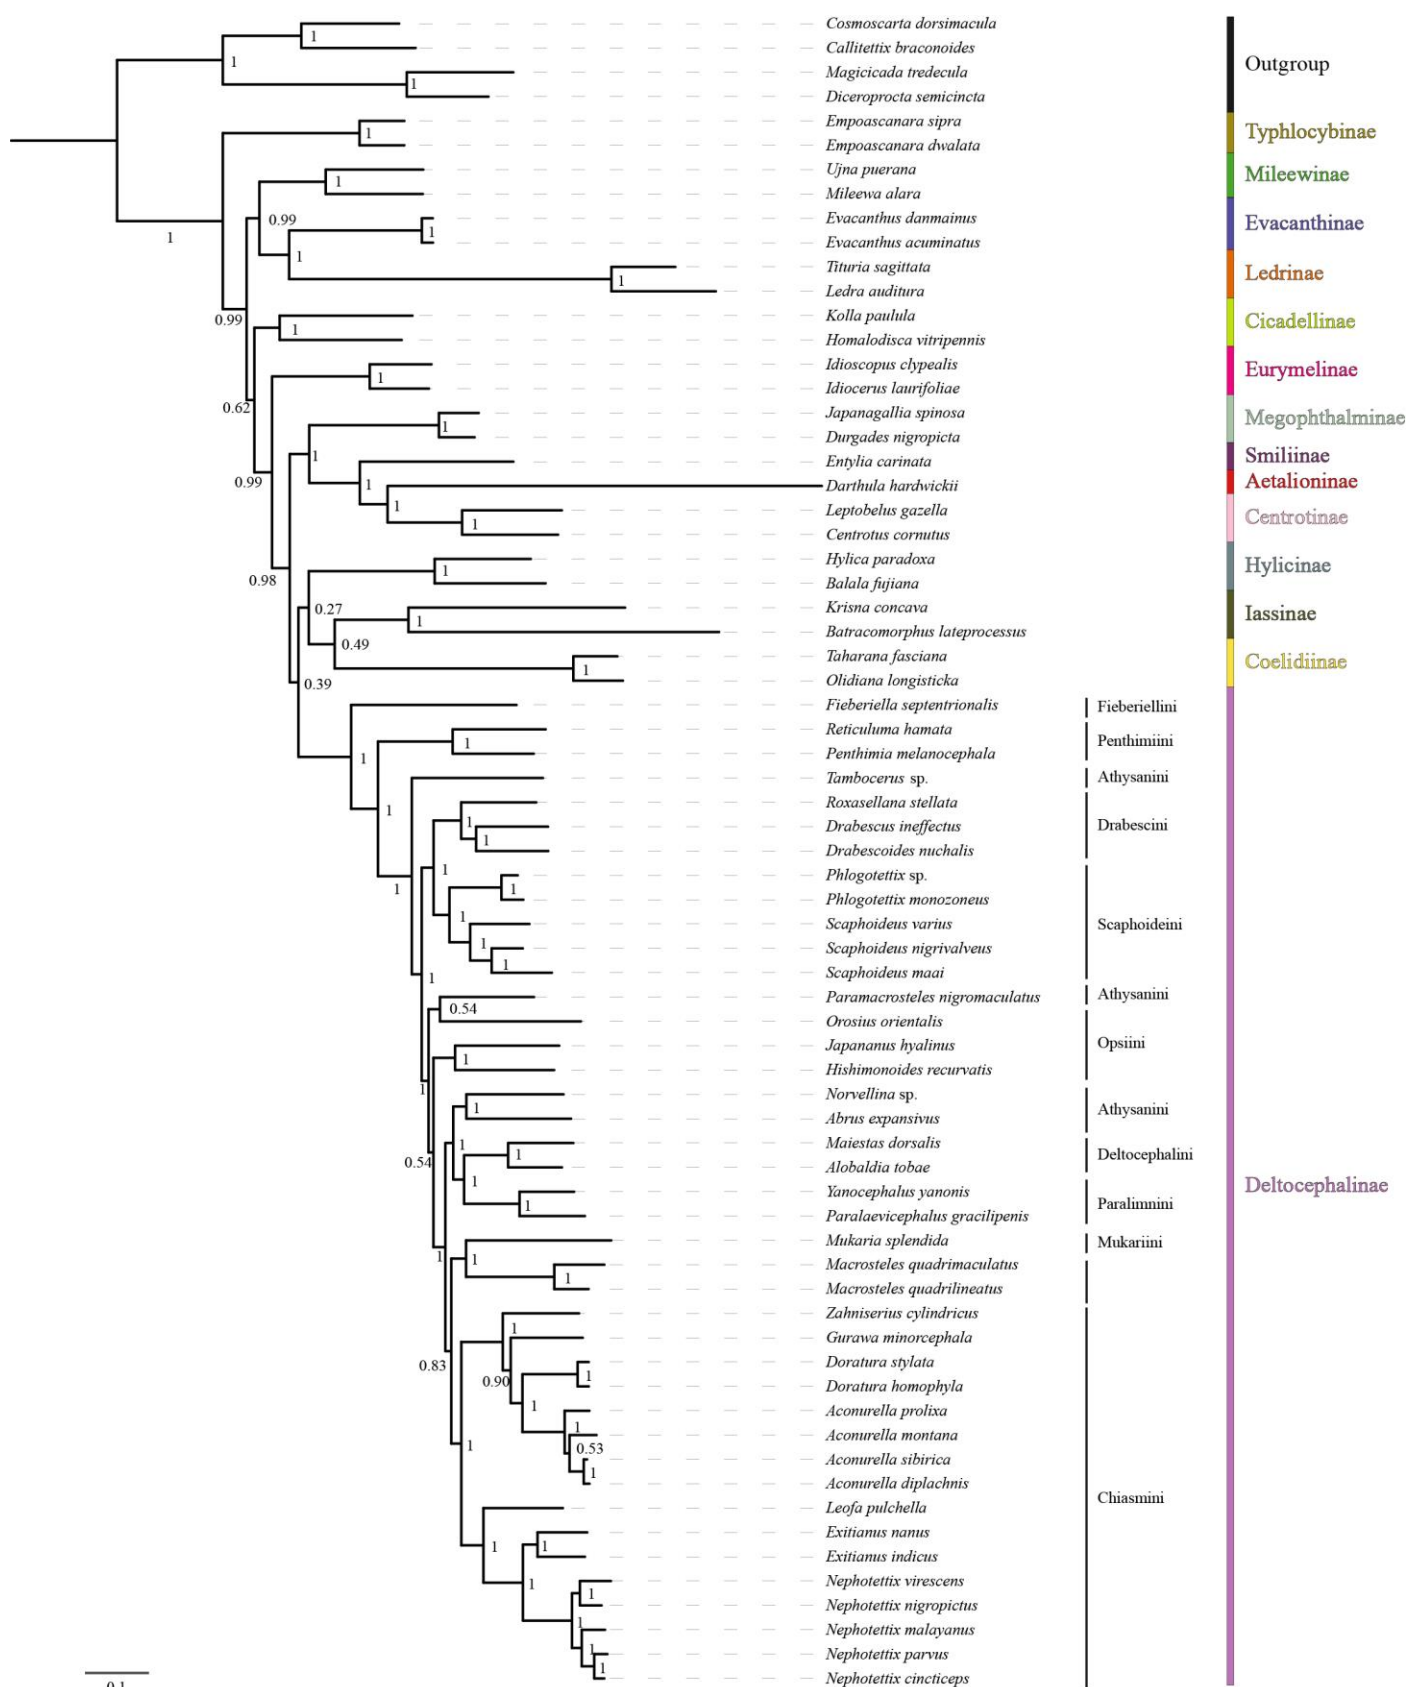

**Figure S19.** The phylogenetic relationships using the Bayesian inference (BI) analysis method based on the PCG12R datasets. Numbers on each node correspond to the posterior probability (PP) values.

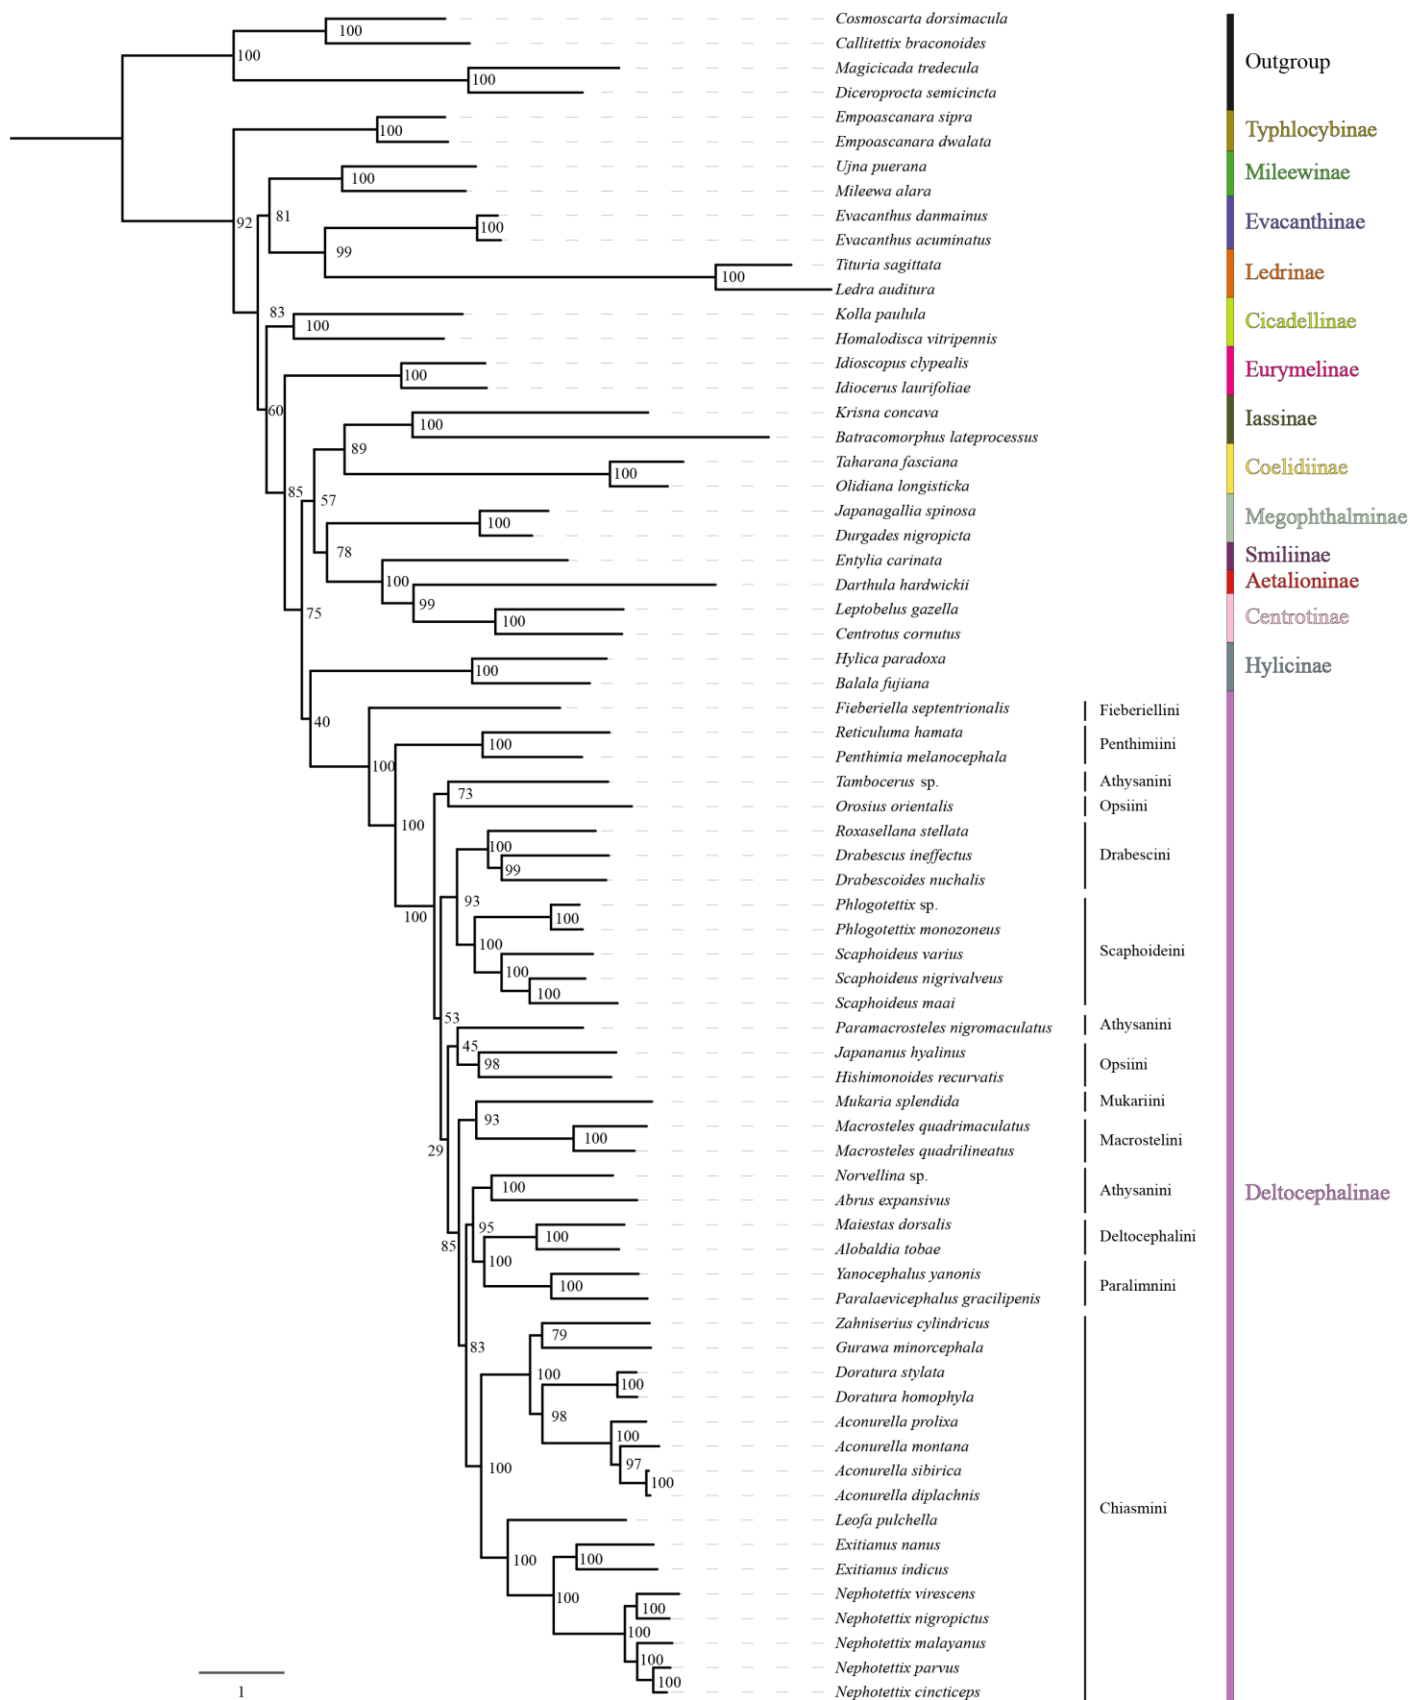

**Figure S20.** The phylogenetic relationships using the maximum likelihood (ML) analysis method based on the PCG datasets. Numbers on each node correspond to the bootstrap values.



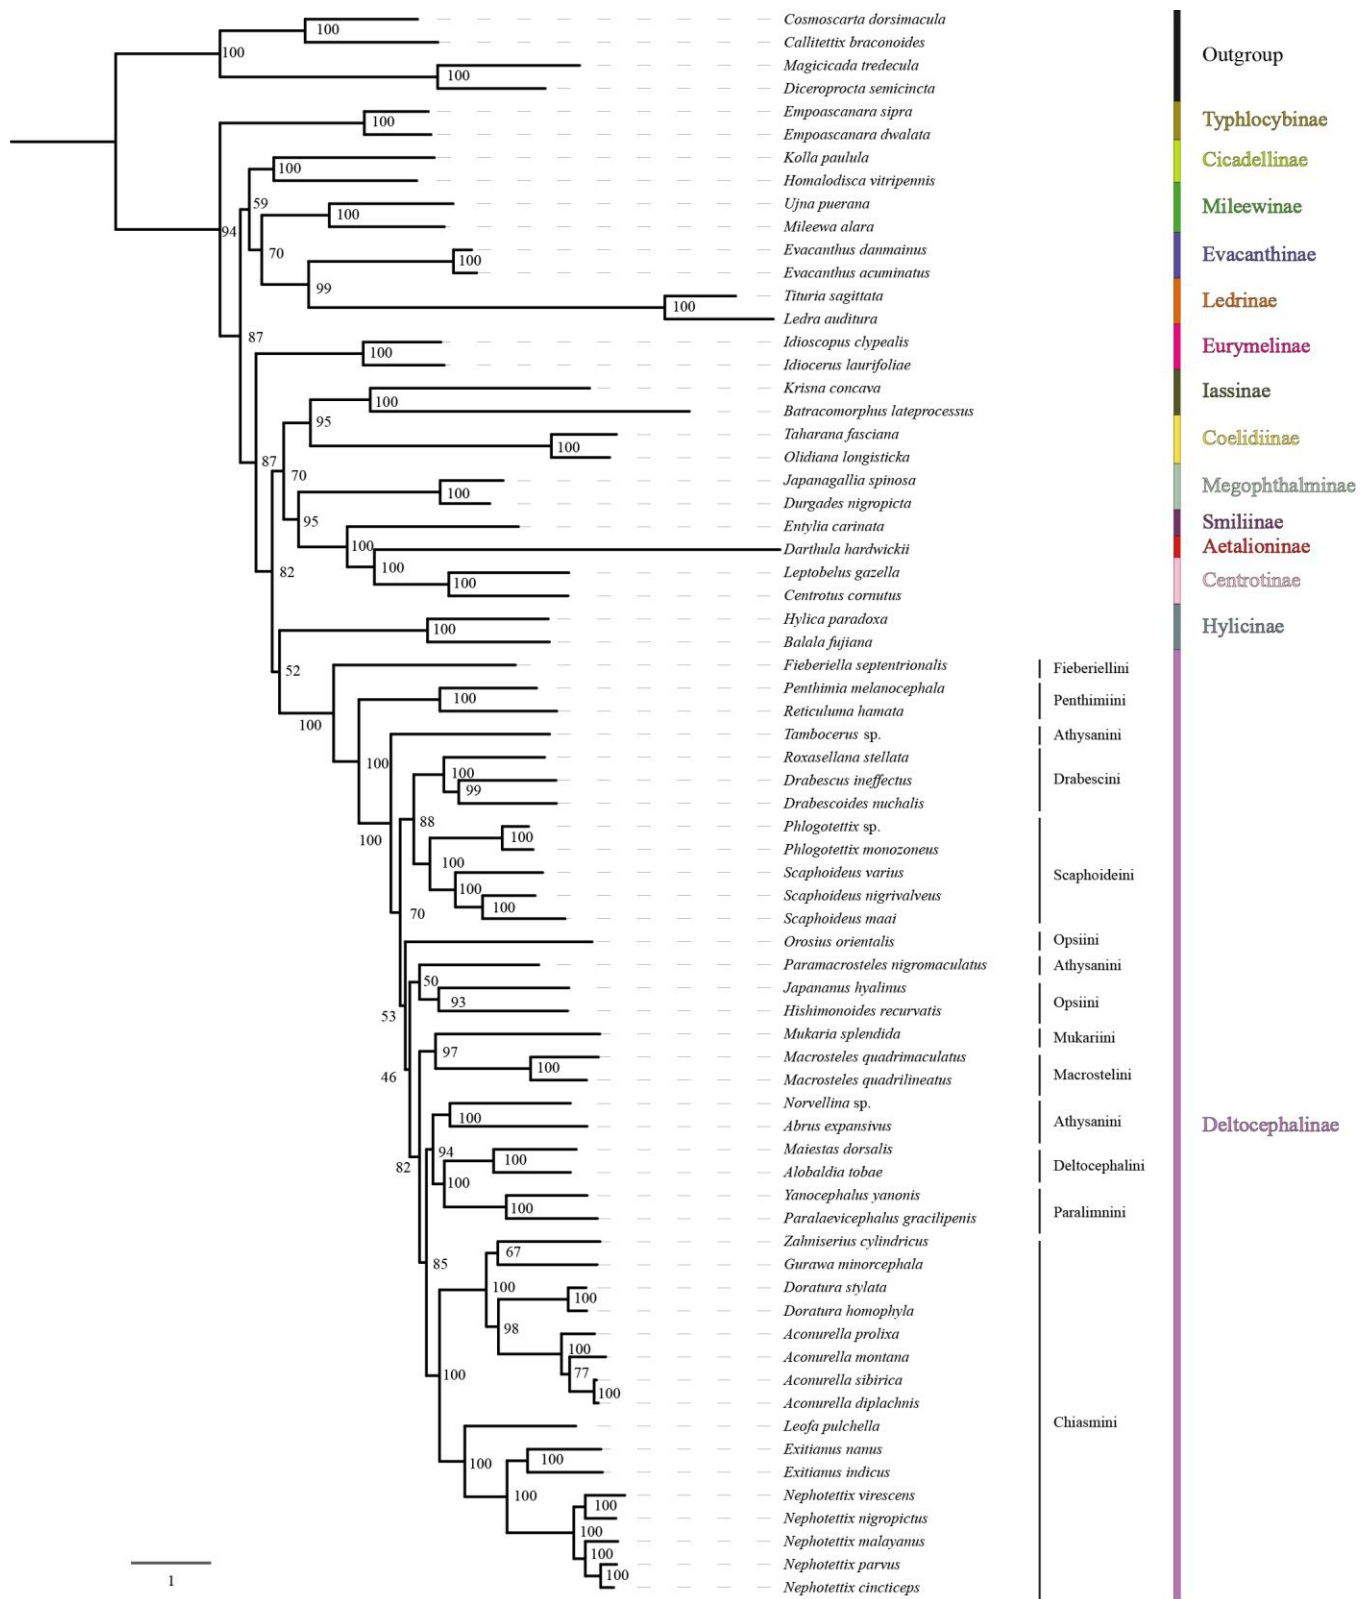

**Figure S21.** The phylogenetic relationships using the maximum likelihood (ML) analysis method based on the PCGR datasets. Numbers on each node correspond to the bootstrap values.

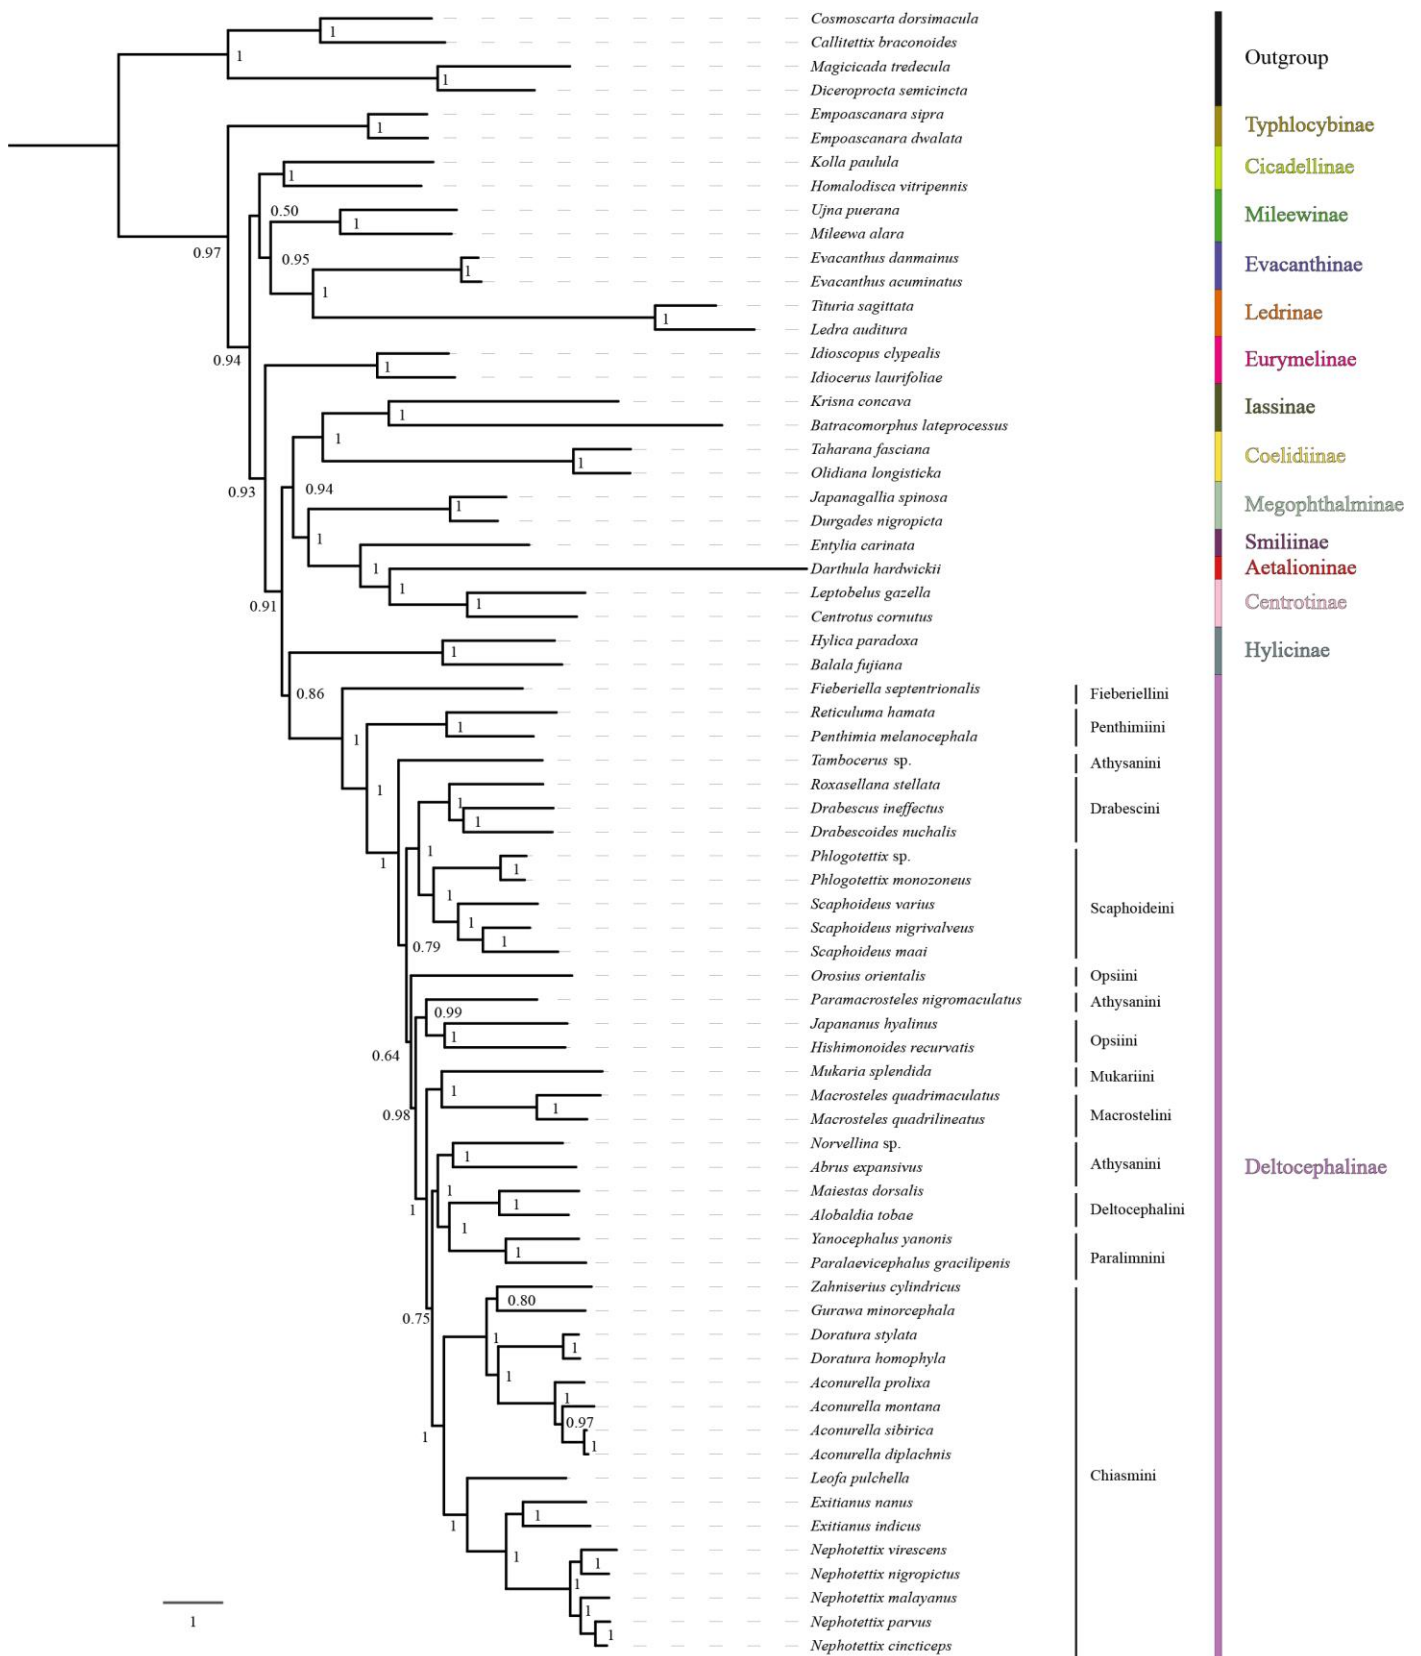

**Figure S22.** The phylogenetic relationships using the Bayesian inference (BI) analysis method based on the PCGR datasets. Numbers on each node correspond to the posterior probability (PP) values.
